# Supplementary material for: Genetic Variants in Nuclear-Encoded Mitochondrial Genes Influence AIDS Progression
Source: PLoS One. 2010 Sep 21;5(9):e12862. doi: 10.1371/journal.pone.0012862 (PMC2943476; doi:10.1371/journal.pone.0012862)
Supplement: Table S2 — NEMP genes and SNPS included in current study. (2.09 MB XLS) [file pone.0012862.s003.xls]

## Sheet: out.from.Leslie.24feb09.txt
Supplementary Table 2. NeMP genes and SNPs included in analyses.
entrez.locus	gene	affy.id	rs.id	chr	pos	strand	loc
23456	ABCB10	SNP_A-2257412	rs12733	1	227719186	-	in gene
23456	ABCB10	SNP_A-2198869	rs10916508	1	227726414	-	in gene
23456	ABCB10	SNP_A-4286669	rs927205	1	227730895	-	in gene
23456	ABCB10	SNP_A-8462160	rs2385787	1	227733235	+	in gene
23456	ABCB10	SNP_A-8350662	rs11810108	1	227735294	+	in gene
23456	ABCB10	SNP_A-8669966	rs2145394	1	227737587	-	in gene
23456	ABCB10	SNP_A-1914482	rs35725309	1	227741966	-	in gene
5825	ABCD3	SNP_A-2309192	rs6660167	1	94660609	+	in gene
5825	ABCD3	SNP_A-1833673	rs10493872	1	94663006	-	in gene
5825	ABCD3	SNP_A-8615572	rs4847303	1	94663500	-	in gene
5825	ABCD3	SNP_A-8473555	rs610088	1	94672270	+	in gene
5825	ABCD3	SNP_A-8461039	rs12143512	1	94674932	-	in gene
5825	ABCD3	SNP_A-8634897	rs598962	1	94689237	-	in gene
5825	ABCD3	SNP_A-1954511	rs4148057	1	94689990	+	in gene
5825	ABCD3	SNP_A-8569542	rs4148050	1	94706546	-	in gene
5825	ABCD3	SNP_A-8296304	rs681187	1	94713964	-	in gene
5825	ABCD3	SNP_A-8397377	rs17410643	1	94714478	+	in gene
5825	ABCD3	SNP_A-8716575	rs17100426	1	94715335	-	in gene
5825	ABCD3	SNP_A-1833821	rs1749541	1	94730966	-	in gene
5825	ABCD3	SNP_A-8303993	rs3849301	1	94750787	-	in gene
5825	ABCD3	SNP_A-1960283	rs529642	1	94752161	-	in gene
5825	ABCD3	SNP_A-2221491	rs630382	1	94757527	+	855
5825	ABCD3	SNP_A-8492837	rs17111643	1	94761532	-	4860
34	ACADM	SNP_A-8649002	rs11801489	1	75961903	-	-967
34	ACADM	SNP_A-8497955	rs11809592	1	75961945	+	-925
34	ACADM	SNP_A-2090853	rs1251079	1	75962033	+	-837
34	ACADM	SNP_A-2314202	rs1251074	1	75963278	-	in gene
34	ACADM	SNP_A-4293998	rs11161465	1	75964332	+	in gene
34	ACADM	SNP_A-2207767	rs1250876	1	75965820	+	in gene
34	ACADM	SNP_A-8624651	rs3818855	1	75971373	-	in gene
34	ACADM	SNP_A-1842968	rs7516477	1	75977090	+	in gene
34	ACADM	SNP_A-4202764	rs12123977	1	75982342	+	in gene
34	ACADM	SNP_A-2219501	rs1146579	1	75982380	+	in gene
34	ACADM	SNP_A-2123451	rs11161510	1	75982877	-	in gene
34	ACADM	SNP_A-2110269	rs11161511	1	75983065	-	in gene
34	ACADM	SNP_A-8303579	rs17647178	1	75983112	-	in gene
34	ACADM	SNP_A-2132993	rs9660848	1	75987096	+	in gene
34	ACADM	SNP_A-4290404	rs1694419	1	75992389	-	in gene
51205	ACP6	SNP_A-4239985	rs1344	1	145585897	-	in gene
51205	ACP6	SNP_A-8454210	rs33965274	1	145597285	+	in gene
51205	ACP6	SNP_A-1832072	rs6674938	1	145598089	-	in gene
51205	ACP6	SNP_A-8438456	rs2275552	1	145598569	+	in gene
51205	ACP6	SNP_A-8471121	rs1578723	1	145600232	-	in gene
51205	ACP6	SNP_A-8504379	rs12025871	1	145601966	-	in gene
51205	ACP6	SNP_A-8574447	rs11240100	1	145602214	+	in gene
51205	ACP6	SNP_A-1966037	rs11579007	1	145602908	-	in gene
51205	ACP6	SNP_A-1966038	rs946907	1	145603396	-	in gene
51205	ACP6	SNP_A-8489637	rs3766507	1	145603848	+	in gene
51205	ACP6	SNP_A-1966041	rs1417280	1	145604526	-	in gene
51205	ACP6	SNP_A-4226352	rs3766505	1	145605519	-	in gene
51205	ACP6	SNP_A-2221338	rs3753427	1	145607078	+	in gene
51205	ACP6	SNP_A-8541157	rs17160530	1	145610511	-	1253
51205	ACP6	SNP_A-8699927	rs11803092	1	145611692	+	2434
79814	AGMAT	SNP_A-1872931	rs41486146	1	15773104	+	in gene
79814	AGMAT	SNP_A-2162139	rs6429753	1	15773124	-	in gene
79814	AGMAT	SNP_A-8478470	rs12691551	1	15780495	+	in gene
79814	AGMAT	SNP_A-2229373	rs6429757	1	15782437	+	in gene
79814	AGMAT	SNP_A-4294116	rs6429758	1	15782482	+	in gene
79814	AGMAT	SNP_A-1891485	rs6429759	1	15782590	+	in gene
204	AK2	SNP_A-8524214	rs11810032	1	33241861	-	-4312
204	AK2	SNP_A-8696735	rs6884	1	33248378	+	in gene
204	AK2	SNP_A-2023678	rs13376642	1	33251150	+	in gene
204	AK2	SNP_A-8597750	rs11799675	1	33257724	-	in gene
204	AK2	SNP_A-8486266	rs10914647	1	33263009	+	in gene
204	AK2	SNP_A-1844819	rs10914648	1	33268884	+	in gene
204	AK2	SNP_A-8523642	rs10753271	1	33269226	+	in gene
8574	AKR7A2	SNP_A-2088421	rs11808495	1	19508628	+	in gene
8574	AKR7A2	SNP_A-8596216	rs2227295	1	19510896	-	in gene
8574	AKR7A2	SNP_A-8427483	rs859218	1	19513263	-	2036
8574	AKR7A2	SNP_A-1870884	rs859217	1	19513285	-	2058
8659	ALDH4A1	SNP_A-8354778	rs9117	1	19071482	-	in gene
8659	ALDH4A1	SNP_A-8638495	rs2230705	1	19076584	+	in gene
8659	ALDH4A1	SNP_A-8656941	rs9426721	1	19086255	+	in gene
8659	ALDH4A1	SNP_A-8356948	rs9426726	1	19087086	+	in gene
8659	ALDH4A1	SNP_A-8662031	rs4912075	1	19088005	-	in gene
8659	ALDH4A1	SNP_A-8600549	rs16862344	1	19094429	-	in gene
8659	ALDH4A1	SNP_A-8291525	rs4912044	1	19102850	+	1191
223	ALDH9A1	SNP_A-8579420	rs1878074	1	163893837	-	-4236
223	ALDH9A1	SNP_A-4304442	rs10800125	1	163895545	+	-2528
223	ALDH9A1	SNP_A-8632211	rs6426928	1	163896873	-	-1200
223	ALDH9A1	SNP_A-8392411	rs12065621	1	163905888	+	in gene
223	ALDH9A1	SNP_A-4201544	rs2050619	1	163907549	+	in gene
223	ALDH9A1	SNP_A-8639099	rs6690818	1	163909491	+	in gene
223	ALDH9A1	SNP_A-1959784	rs10918239	1	163911489	+	in gene
223	ALDH9A1	SNP_A-8627142	rs12083232	1	163912642	+	in gene
223	ALDH9A1	SNP_A-8709825	rs16849374	1	163916339	-	in gene
223	ALDH9A1	SNP_A-8654606	rs1065756	1	163916475	-	in gene
223	ALDH9A1	SNP_A-1891710	rs2882006	1	163917777	+	in gene
223	ALDH9A1	SNP_A-4236784	rs1913844	1	163918126	+	in gene
223	ALDH9A1	SNP_A-8374524	rs12076579	1	163918540	+	in gene
223	ALDH9A1	SNP_A-2259233	rs7555787	1	163918561	-	in gene
223	ALDH9A1	SNP_A-2087458	rs1143659	1	163918897	+	in gene
223	ALDH9A1	SNP_A-2212157	rs10918241	1	163921151	-	in gene
223	ALDH9A1	SNP_A-4291131	rs41326750	1	163921475	+	in gene
223	ALDH9A1	SNP_A-4256171	rs12033254	1	163921493	+	in gene
223	ALDH9A1	SNP_A-8520921	rs7546215	1	163922728	-	in gene
223	ALDH9A1	SNP_A-8498460	rs1538115	1	163925374	-	in gene
223	ALDH9A1	SNP_A-2023762	rs10753688	1	163933072	-	in gene
128240	APOA1BP	SNP_A-2082269	rs942960	1	154829554	-	in gene
128240	APOA1BP	SNP_A-4221888	rs942962	1	154829649	-	in gene
128240	APOA1BP	SNP_A-1894596	rs6668178	1	154830437	+	in gene
128240	APOA1BP	SNP_A-8356942	rs6666910	1	154832735	-	2020
128240	APOA1BP	SNP_A-2271225	rs16837530	1	154833744	+	3029
128240	APOA1BP	SNP_A-2182031	rs879461	1	154834120	-	3405
128240	APOA1BP	SNP_A-2219946	rs7355216	1	154834354	-	3639
128240	APOA1BP	SNP_A-2310496	rs11264506	1	154835199	-	4484
55210	ATAD3A	SNP_A-8596426	rs9439462	1	1452629	-	in gene
55210	ATAD3A	SNP_A-8333319	rs1987191	1	1457348	-	in gene
83858	ATAD3B	SNP_A-8503508	rs12354350	1	1401739	-	in gene
83858	ATAD3B	SNP_A-8449995	rs819976	1	1411394	+	in gene
515	ATP5F1	SNP_A-1962042	rs2298185	1	111791788	+	-1478
515	ATP5F1	SNP_A-2049261	rs17528989	1	111792259	+	-1007
515	ATP5F1	SNP_A-8690337	rs1264899	1	111793618	-	in gene
515	ATP5F1	SNP_A-8350800	rs2298188	1	111794039	-	in gene
515	ATP5F1	SNP_A-8386613	rs1264897	1	111794747	-	in gene
515	ATP5F1	SNP_A-8373855	rs12039707	1	111801867	-	in gene
64756	ATPAF1	SNP_A-4214973	rs2181412	1	46869234	+	-1762
64756	ATPAF1	SNP_A-8446184	rs1258073	1	46870395	-	-601
64756	ATPAF1	SNP_A-2078172	rs1258072	1	46870635	+	-361
64756	ATPAF1	SNP_A-8286975	rs2181411	1	46873704	+	in gene
64756	ATPAF1	SNP_A-1788896	rs1258058	1	46879906	-	in gene
64756	ATPAF1	SNP_A-2156032	rs744096	1	46879977	+	in gene
64756	ATPAF1	SNP_A-2056167	rs736188	1	46881415	+	in gene
64756	ATPAF1	SNP_A-4269520	rs1273237	1	46881838	+	in gene
64756	ATPAF1	SNP_A-4269521	rs1933932	1	46881915	+	in gene
64756	ATPAF1	SNP_A-4304644	rs2486161	1	46887638	+	in gene
64756	ATPAF1	SNP_A-8326314	rs12087698	1	46889210	-	in gene
64756	ATPAF1	SNP_A-4242058	rs629412	1	46893260	+	in gene
64756	ATPAF1	SNP_A-2307585	rs11211334	1	46894006	-	in gene
64756	ATPAF1	SNP_A-2126509	rs631368	1	46894089	-	in gene
64756	ATPAF1	SNP_A-4246827	rs611468	1	46897066	+	in gene
64756	ATPAF1	SNP_A-1901954	rs7354865	1	46897586	-	in gene
64756	ATPAF1	SNP_A-2112897	rs682000	1	46897772	+	in gene
64756	ATPAF1	SNP_A-8392423	rs654509	1	46899758	-	in gene
64756	ATPAF1	SNP_A-4280711	rs12094663	1	46906908	+	222
93974	ATPIF1	SNP_A-1996494	rs3767303	1	28436237	+	in gene
93974	ATPIF1	SNP_A-8322913	rs6686978	1	28436346	-	in gene
93974	ATPIF1	SNP_A-2254676	rs9508	1	28436866	+	in gene
93974	ATPIF1	SNP_A-8281716	rs10493031	1	28438148	+	950
93974	ATPIF1	SNP_A-4198024	rs576550	1	28439195	-	1997
93974	ATPIF1	SNP_A-8357026	rs12129991	1	28439792	-	2594
54998	AURKAIP1	SNP_A-8628941	rs2649589	1	1301579	-	1136
51027	BOLA1	SNP_A-2208604	rs7534365	1	148142748	+	3779
25874	BRP44	SNP_A-4202818	rs203782	1	166149010	+	-4924
25874	BRP44	SNP_A-4209209	rs10489202	1	166169703	-	in gene
440574	C1orf151	SNP_A-8449716	rs2745217	1	19794334	-	-1720
440574	C1orf151	SNP_A-2202675	rs860847	1	19800140	+	in gene
440574	C1orf151	SNP_A-4293467	rs840265	1	19800307	-	in gene
440574	C1orf151	SNP_A-4277334	rs840264	1	19801191	-	in gene
440574	C1orf151	SNP_A-2057688	rs41510945	1	19801328	-	in gene
440574	C1orf151	SNP_A-2149910	rs1770483	1	19802839	-	in gene
440574	C1orf151	SNP_A-8393753	rs2745220	1	19803226	-	in gene
440574	C1orf151	SNP_A-4295878	rs2745221	1	19803616	-	in gene
440574	C1orf151	SNP_A-8374832	rs1737422	1	19812036	+	in gene
440574	C1orf151	SNP_A-1798911	rs7518758	1	19814589	-	in gene
440574	C1orf151	SNP_A-2142983	rs12073300	1	19815518	-	in gene
440574	C1orf151	SNP_A-2229719	rs2294629	1	19816410	+	in gene
440574	C1orf151	SNP_A-1915583	rs7531524	1	19818444	-	in gene
440574	C1orf151	SNP_A-1946896	rs12161406	1	19824269	+	in gene
440574	C1orf151	SNP_A-2103851	rs2792059	1	19828961	-	1200
440574	C1orf151	SNP_A-1910298	rs2792061	1	19831316	+	3555
440574	C1orf151	SNP_A-4304685	rs2792063	1	19832656	-	4895
388753	C1orf31	SNP_A-1953879	rs4300255	1	232576885	+	in gene
388753	C1orf31	SNP_A-1834256	rs6586385	1	232577836	-	in gene
388753	C1orf31	SNP_A-2120033	rs6671513	1	232578792	+	in gene
388753	C1orf31	SNP_A-8632274	rs10429821	1	232579094	+	in gene
388753	C1orf31	SNP_A-2238186	rs10429824	1	232579216	+	in gene
200205	C1orf69	SNP_A-1816000	rs6666843	1	226434853	+	in gene
200205	C1orf69	SNP_A-2000748	rs4653917	1	226438377	-	1796
200205	C1orf69	SNP_A-1987235	rs1059778	1	226438685	+	2104
200205	C1orf69	SNP_A-2060943	rs2313599	1	226440193	+	3612
200205	C1orf69	SNP_A-8294698	rs2185544	1	226440875	-	4294
56997	CABC1	SNP_A-8525722	rs7513120	1	225192620	+	-1941
56997	CABC1	SNP_A-8408720	rs7519701	1	225196206	+	in gene
56997	CABC1	SNP_A-2302557	rs1289473	1	225196343	-	in gene
56997	CABC1	SNP_A-4293449	rs16846733	1	225206395	-	in gene
56997	CABC1	SNP_A-2093970	rs2802271	1	225208116	+	in gene
56997	CABC1	SNP_A-4271781	rs41527149	1	225208194	-	in gene
56997	CABC1	SNP_A-4278065	rs16841298	1	225213391	-	in gene
56997	CABC1	SNP_A-8384015	rs1888828	1	225216838	-	in gene
56997	CABC1	SNP_A-4223946	rs1892490	1	225216889	-	in gene
56997	CABC1	SNP_A-2206880	rs2154367	1	225220553	-	in gene
56997	CABC1	SNP_A-8629130	rs7553837	1	225224231	+	in gene
56997	CABC1	SNP_A-8311057	rs7515533	1	225228933	+	in gene
56997	CABC1	SNP_A-4302668	rs12593	1	225238913	-	in gene
56997	CABC1	SNP_A-2210028	rs3768419	1	225240100	-	in gene
56997	CABC1	SNP_A-4289960	rs1045287	1	225245585	+	3716
56997	CABC1	SNP_A-8666697	rs1045286	1	225245660	-	3791
56997	CABC1	SNP_A-1830745	rs16846772	1	225246697	-	4828
56267	CCBL2	SNP_A-2119128	rs11806868	1	89171991	+	-2053
56267	CCBL2	SNP_A-8287913	rs4393127	1	89172019	-	-2025
56267	CCBL2	SNP_A-2030492	rs12410691	1	89172378	-	-1666
56267	CCBL2	SNP_A-8436786	rs17472003	1	89182076	-	in gene
56267	CCBL2	SNP_A-2206728	rs17130658	1	89183450	+	in gene
56267	CCBL2	SNP_A-8524946	rs10436919	1	89184467	+	in gene
56267	CCBL2	SNP_A-1808693	rs17130660	1	89187770	+	in gene
56267	CCBL2	SNP_A-8562468	rs11579178	1	89190506	-	in gene
56267	CCBL2	SNP_A-2021259	rs17432348	1	89195913	+	in gene
56267	CCBL2	SNP_A-8381176	rs2038905	1	89196211	-	in gene
56267	CCBL2	SNP_A-8404781	rs6682686	1	89196508	+	in gene
56267	CCBL2	SNP_A-8658625	rs7527613	1	89200009	+	in gene
56267	CCBL2	SNP_A-1792401	rs1325922	1	89200041	+	in gene
56267	CCBL2	SNP_A-8372892	rs12090796	1	89200141	-	in gene
56267	CCBL2	SNP_A-1792410	rs3753683	1	89200159	-	in gene
56267	CCBL2	SNP_A-8307246	rs1409149	1	89201737	-	in gene
56267	CCBL2	SNP_A-8539017	rs3753679	1	89208002	-	in gene
56267	CCBL2	SNP_A-1953176	rs7517036	1	89216555	+	in gene
56267	CCBL2	SNP_A-8447499	rs2765525	1	89216594	-	in gene
56267	CCBL2	SNP_A-8300388	rs12068415	1	89220398	-	in gene
56267	CCBL2	SNP_A-1853187	rs17130676	1	89222850	+	in gene
56267	CCBL2	SNP_A-2230228	rs7540196	1	89233755	-	2651
56267	CCBL2	SNP_A-1864769	rs7542823	1	89234125	+	3021
56267	CCBL2	SNP_A-2311573	rs17130677	1	89234242	-	3138
56267	CCBL2	SNP_A-1842818	rs17486391	1	89234453	+	3349
25932	CLIC4	SNP_A-8710634	rs3131500	1	24947955	-	in gene
25932	CLIC4	SNP_A-1832458	rs1890449	1	24948388	-	in gene
25932	CLIC4	SNP_A-2236725	rs3131499	1	24948883	+	in gene
25932	CLIC4	SNP_A-1888602	rs6604978	1	24963033	-	in gene
25932	CLIC4	SNP_A-8699539	rs6604979	1	24972025	-	in gene
25932	CLIC4	SNP_A-8357649	rs7553761	1	24977843	-	in gene
25932	CLIC4	SNP_A-2063624	rs3122056	1	24983627	-	in gene
25932	CLIC4	SNP_A-8309859	rs12058768	1	24994522	+	in gene
25932	CLIC4	SNP_A-2280183	rs10732912	1	25000710	-	in gene
25932	CLIC4	SNP_A-1999955	rs7533367	1	25002445	-	in gene
25932	CLIC4	SNP_A-4194081	rs4428828	1	25014684	+	in gene
25932	CLIC4	SNP_A-1913427	rs4233040	1	25017160	-	in gene
25932	CLIC4	SNP_A-8372598	rs9259	1	25040711	-	in gene
25932	CLIC4	SNP_A-8703353	rs4649025	1	25042462	-	in gene
25932	CLIC4	SNP_A-8599048	rs7535819	1	25045624	+	2278
1376	CPT2	SNP_A-8695567	rs1799821	1	53449036	-	in gene
1376	CPT2	SNP_A-8515861	rs737464	1	53451142	+	in gene
1376	CPT2	SNP_A-8705735	rs1871748	1	53451641	-	in gene
1376	CPT2	SNP_A-8431401	rs1056425	1	53452678	+	223
51706	CYB5R1	SNP_A-4242284	rs7514296	1	201193181	-	-4443
51706	CYB5R1	SNP_A-1810790	rs10800888	1	201194650	+	-2974
51706	CYB5R1	SNP_A-8474510	rs4989513	1	201196209	+	-1415
51706	CYB5R1	SNP_A-8519877	rs16850809	1	201196873	-	-751
51706	CYB5R1	SNP_A-8665023	rs2232853	1	201198581	-	in gene
51706	CYB5R1	SNP_A-8665024	rs2232851	1	201198777	+	in gene
51706	CYB5R1	SNP_A-8665027	rs2232849	1	201199065	+	in gene
51706	CYB5R1	SNP_A-2072870	rs2232847	1	201200280	+	in gene
51706	CYB5R1	SNP_A-8550854	rs2232845	1	201200402	-	in gene
51706	CYB5R1	SNP_A-8622417	rs1418445	1	201200615	-	in gene
51706	CYB5R1	SNP_A-2124458	rs2363768	1	201200667	+	in gene
51706	CYB5R1	SNP_A-8665031	rs2363769	1	201207433	+	4406
7818	DAP3	SNP_A-8689423	rs348196	1	153933585	-	in gene
7818	DAP3	SNP_A-8348579	rs12035524	1	153933726	-	in gene
7818	DAP3	SNP_A-8563853	rs591516	1	153949237	+	in gene
7818	DAP3	SNP_A-8646561	rs490608	1	153949494	-	in gene
7818	DAP3	SNP_A-1967414	rs821551	1	153955204	-	in gene
7818	DAP3	SNP_A-8697737	rs4933	1	153965742	-	in gene
7818	DAP3	SNP_A-8530206	rs598176	1	153974177	-	in gene
55157	DARS2	SNP_A-1907948	rs9425752	1	172058240	-	-2341
55157	DARS2	SNP_A-4198760	rs2068871	1	172062792	-	in gene
55157	DARS2	SNP_A-1976785	rs9286890	1	172062852	+	in gene
55157	DARS2	SNP_A-2046853	rs3791020	1	172079820	+	in gene
55157	DARS2	SNP_A-2294053	rs6691327	1	172080071	-	in gene
55157	DARS2	SNP_A-2066806	rs7518130	1	172091990	+	in gene
55157	DARS2	SNP_A-1956688	rs2295366	1	172092315	-	in gene
55157	DARS2	SNP_A-8365687	rs9660185	1	172098724	+	4419
1629	DBT	SNP_A-1960081	rs11166412	1	100428853	-	in gene
1629	DBT	SNP_A-8700300	rs11166413	1	100429082	-	in gene
1629	DBT	SNP_A-8676465	rs12044663	1	100429527	+	in gene
1629	DBT	SNP_A-2086181	rs2784176	1	100436499	-	in gene
1629	DBT	SNP_A-4213932	rs4143055	1	100462710	+	in gene
1629	DBT	SNP_A-4218595	rs7526860	1	100462833	+	in gene
1629	DBT	SNP_A-8321864	rs6682782	1	100465882	+	in gene
1629	DBT	SNP_A-2072320	rs7543453	1	100481889	+	in gene
1629	DBT	SNP_A-1874307	rs10783127	1	100485888	-	in gene
1629	DBT	SNP_A-2059933	rs7520551	1	100488755	+	758
1629	DBT	SNP_A-8288203	rs3131837	1	100490348	+	2351
23576	DDAH1	SNP_A-8318420	rs1874807	1	85551981	+	-4775
23576	DDAH1	SNP_A-4222507	rs233111	1	85558243	-	in gene
23576	DDAH1	SNP_A-2229265	rs233112	1	85558339	+	in gene
23576	DDAH1	SNP_A-2162668	rs233118	1	85560555	+	in gene
23576	DDAH1	SNP_A-2299741	rs233122	1	85562646	-	in gene
23576	DDAH1	SNP_A-2299745	rs1498373	1	85563221	-	in gene
23576	DDAH1	SNP_A-2239602	rs233124	1	85564246	-	in gene
23576	DDAH1	SNP_A-2251964	rs17126044	1	85565350	+	in gene
23576	DDAH1	SNP_A-8709316	rs2268667	1	85566334	+	in gene
23576	DDAH1	SNP_A-8661801	rs12029474	1	85566451	+	in gene
23576	DDAH1	SNP_A-4240109	rs18582	1	85567407	+	in gene
23576	DDAH1	SNP_A-8594670	rs11161599	1	85568553	+	in gene
23576	DDAH1	SNP_A-2285047	rs2474121	1	85570626	+	in gene
23576	DDAH1	SNP_A-4277077	rs2389913	1	85570663	-	in gene
23576	DDAH1	SNP_A-8384199	rs233064	1	85576216	+	in gene
23576	DDAH1	SNP_A-4258347	rs41379646	1	85580739	+	in gene
23576	DDAH1	SNP_A-4291480	rs12717763	1	85580752	-	in gene
23576	DDAH1	SNP_A-2031821	rs3768226	1	85580913	-	in gene
23576	DDAH1	SNP_A-4301564	rs233073	1	85581346	+	in gene
23576	DDAH1	SNP_A-8713979	rs2284798	1	85587166	+	in gene
23576	DDAH1	SNP_A-1894356	rs2284800	1	85588198	-	in gene
23576	DDAH1	SNP_A-8512633	rs233093	1	85595708	-	in gene
23576	DDAH1	SNP_A-8386735	rs11805470	1	85598466	+	in gene
23576	DDAH1	SNP_A-8593519	rs2474123	1	85600040	-	in gene
23576	DDAH1	SNP_A-4203826	rs233043	1	85601412	+	in gene
23576	DDAH1	SNP_A-4197268	rs233044	1	85601428	-	in gene
23576	DDAH1	SNP_A-2123997	rs233045	1	85601698	-	in gene
23576	DDAH1	SNP_A-4303229	rs233051	1	85611001	+	in gene
23576	DDAH1	SNP_A-2300296	rs41438644	1	85615826	+	in gene
23576	DDAH1	SNP_A-2300403	rs10489513	1	85628210	-	in gene
23576	DDAH1	SNP_A-1806688	rs1342323	1	85630162	+	in gene
23576	DDAH1	SNP_A-8498821	rs12033483	1	85630711	+	in gene
23576	DDAH1	SNP_A-1844111	rs10747319	1	85642091	+	in gene
23576	DDAH1	SNP_A-2232142	rs7526667	1	85642928	+	in gene
23576	DDAH1	SNP_A-8287621	rs6576765	1	85643600	+	in gene
23576	DDAH1	SNP_A-2300533	rs2037594	1	85644206	-	in gene
23576	DDAH1	SNP_A-8685220	rs6657732	1	85647083	+	in gene
23576	DDAH1	SNP_A-8590499	rs17127190	1	85647287	-	in gene
23576	DDAH1	SNP_A-8567059	rs6673833	1	85648210	-	in gene
23576	DDAH1	SNP_A-2073172	rs1554597	1	85649686	+	in gene
23576	DDAH1	SNP_A-1799540	rs10782549	1	85653866	+	in gene
23576	DDAH1	SNP_A-2095913	rs6672870	1	85664045	-	in gene
23576	DDAH1	SNP_A-8614434	rs12129013	1	85664297	+	in gene
23576	DDAH1	SNP_A-8643566	rs12126355	1	85664462	+	in gene
23576	DDAH1	SNP_A-2084187	rs17127399	1	85669756	+	in gene
23576	DDAH1	SNP_A-1898789	rs17384381	1	85670158	+	in gene
23576	DDAH1	SNP_A-1800052	rs11582061	1	85670369	-	in gene
23576	DDAH1	SNP_A-1855151	rs17388521	1	85670492	+	in gene
23576	DDAH1	SNP_A-2174096	rs641864	1	85670517	+	in gene
23576	DDAH1	SNP_A-2244262	rs11161614	1	85670748	-	in gene
23576	DDAH1	SNP_A-2219741	rs1523993	1	85671716	+	in gene
23576	DDAH1	SNP_A-8711696	rs17127565	1	85677550	-	in gene
23576	DDAH1	SNP_A-1822518	rs12130591	1	85677573	-	in gene
23576	DDAH1	SNP_A-8711701	rs591917	1	85677724	+	in gene
23576	DDAH1	SNP_A-2300837	rs17388696	1	85678015	+	in gene
23576	DDAH1	SNP_A-2300845	rs11161615	1	85679404	+	in gene
23576	DDAH1	SNP_A-1855100	rs11161616	1	85680213	-	in gene
23576	DDAH1	SNP_A-8406412	rs1146381	1	85683878	-	in gene
23576	DDAH1	SNP_A-8687381	rs17388780	1	85685317	+	in gene
23576	DDAH1	SNP_A-8421704	rs11161617	1	85686126	-	in gene
23576	DDAH1	SNP_A-8351166	rs648310	1	85687722	+	in gene
23576	DDAH1	SNP_A-2053810	rs11587876	1	85687771	-	in gene
23576	DDAH1	SNP_A-4278233	rs11161618	1	85687990	+	in gene
23576	DDAH1	SNP_A-2300992	rs2935	1	85690151	-	in gene
23576	DDAH1	SNP_A-8350049	rs12717764	1	85692807	-	in gene
23576	DDAH1	SNP_A-8496850	rs506733	1	85695249	+	in gene
23576	DDAH1	SNP_A-8509315	rs17389112	1	85697823	-	in gene
23576	DDAH1	SNP_A-8659505	rs485987	1	85699469	-	in gene
23576	DDAH1	SNP_A-1812763	rs480414	1	85700051	+	in gene
23576	DDAH1	SNP_A-2279025	rs1241321	1	85700467	+	in gene
23576	DDAH1	SNP_A-2301243	rs1403956	1	85706226	+	2815
55735	DNAJC11	SNP_A-8472655	rs742394	1	6612727	-	-4091
55735	DNAJC11	SNP_A-1807081	rs200457	1	6627943	-	in gene
55735	DNAJC11	SNP_A-8581138	rs12137794	1	6628531	+	in gene
55735	DNAJC11	SNP_A-1842009	rs7549198	1	6632197	-	in gene
55735	DNAJC11	SNP_A-4268028	rs2235564	1	6635701	+	in gene
55735	DNAJC11	SNP_A-4245055	rs200440	1	6635869	-	in gene
55735	DNAJC11	SNP_A-4197989	rs200451	1	6643821	+	in gene
55735	DNAJC11	SNP_A-8656325	rs2235563	1	6646692	-	in gene
55735	DNAJC11	SNP_A-2071552	rs156985	1	6664868	+	in gene
55735	DNAJC11	SNP_A-2070122	rs200444	1	6668031	-	in gene
55735	DNAJC11	SNP_A-1836468	rs277686	1	6670484	-	in gene
55735	DNAJC11	SNP_A-2031548	rs156989	1	6670716	-	in gene
55735	DNAJC11	SNP_A-4290613	rs3827729	1	6679021	-	in gene
55735	DNAJC11	SNP_A-1786554	rs278017	1	6685724	-	1264
55735	DNAJC11	SNP_A-2212939	rs399242	1	6689323	+	4863
116228	FAM36A	SNP_A-8586806	rs11801533	1	243069053	+	in gene
116228	FAM36A	SNP_A-1847639	rs10927333	1	243069653	-	in gene
116228	FAM36A	SNP_A-8634435	rs10927334	1	243070174	-	in gene
2224	FDPS	SNP_A-2294307	rs12032720	1	153541584	-	-3790
2224	FDPS	SNP_A-4240377	rs11264359	1	153549453	+	in gene
2271	FH	SNP_A-1781903	rs947306	1	239725982	+	-1544
2271	FH	SNP_A-8562022	rs2153695	1	239726325	+	-1201
2271	FH	SNP_A-1954261	rs10802968	1	239733166	+	in gene
2271	FH	SNP_A-8384737	rs12065955	1	239735872	+	in gene
2271	FH	SNP_A-2148146	rs11802956	1	239738261	-	in gene
2271	FH	SNP_A-8377212	rs12062672	1	239739209	+	in gene
2271	FH	SNP_A-2023456	rs12563264	1	239740956	+	in gene
2271	FH	SNP_A-8345928	rs12059383	1	239744297	+	in gene
2271	FH	SNP_A-1858366	rs1335898	1	239745930	+	in gene
2271	FH	SNP_A-8332060	rs12072899	1	239746097	+	in gene
2271	FH	SNP_A-8361504	rs6678986	1	239751454	-	1777
2271	FH	SNP_A-8651573	rs10802969	1	239753689	-	4012
51022	GLRX2	SNP_A-4219736	rs912070	1	191342067	-	200
2787	GNG5	SNP_A-8507494	rs7524576	1	84732322	-	-4358
2787	GNG5	SNP_A-8363136	rs1246159	1	84735588	+	-1092
2787	GNG5	SNP_A-4217453	rs17110519	1	84741337	+	in gene
2787	GNG5	SNP_A-1835039	rs3813605	1	84743535	+	in gene
2787	GNG5	SNP_A-8459312	rs312397	1	84746022	+	1191
2787	GNG5	SNP_A-8674741	rs11163987	1	84746737	-	1906
51179	HAO2	SNP_A-2144059	rs2885607	1	119708703	+	-4222
51179	HAO2	SNP_A-2253649	rs6683756	1	119708995	+	-3930
51179	HAO2	SNP_A-1942934	rs3753266	1	119710731	-	-2194
51179	HAO2	SNP_A-1825794	rs3753263	1	119711372	-	-1553
51179	HAO2	SNP_A-1900553	rs3753262	1	119711602	+	-1323
51179	HAO2	SNP_A-8639177	rs3753261	1	119712012	-	-913
51179	HAO2	SNP_A-8712485	rs6656360	1	119712028	-	-897
51179	HAO2	SNP_A-8593634	rs6691943	1	119715207	-	in gene
51179	HAO2	SNP_A-8611945	rs6667203	1	119715347	+	in gene
51179	HAO2	SNP_A-8700062	rs3753260	1	119724173	+	in gene
51179	HAO2	SNP_A-1964330	rs2298028	1	119727459	-	in gene
51179	HAO2	SNP_A-1849843	rs12032036	1	119731891	+	in gene
51179	HAO2	SNP_A-1849001	rs41443445	1	119734775	+	in gene
51179	HAO2	SNP_A-2197922	rs2275608	1	119736584	+	in gene
10542	HBXIP	SNP_A-1810850	rs11102099	1	110751985	-	in gene
3155	HMGCL	SNP_A-1856502	rs2256179	1	24004892	+	in gene
3155	HMGCL	SNP_A-2282881	rs16828744	1	24021575	+	in gene
3158	HMGCS2	SNP_A-1902603	rs17258425	1	120088386	-	-4139
3158	HMGCS2	SNP_A-8574264	rs593911	1	120089986	-	-2539
3158	HMGCS2	SNP_A-1813827	rs608358	1	120090930	+	-1595
3158	HMGCS2	SNP_A-4278811	rs12096684	1	120093003	+	in gene
3158	HMGCS2	SNP_A-4208295	rs532208	1	120093802	+	in gene
3158	HMGCS2	SNP_A-8636548	rs12119776	1	120094223	+	in gene
3158	HMGCS2	SNP_A-8648194	rs667246	1	120094890	+	in gene
3158	HMGCS2	SNP_A-8607554	rs668156	1	120095091	-	in gene
3158	HMGCS2	SNP_A-8609227	rs10923896	1	120095909	+	in gene
3158	HMGCS2	SNP_A-2177037	rs10923897	1	120098818	-	in gene
3158	HMGCS2	SNP_A-2055010	rs619167	1	120098974	+	in gene
3158	HMGCS2	SNP_A-2219658	rs651347	1	120100226	-	in gene
3158	HMGCS2	SNP_A-2301540	rs17024205	1	120101641	+	in gene
3158	HMGCS2	SNP_A-2163687	rs12562383	1	120107048	-	in gene
3158	HMGCS2	SNP_A-8409327	rs12079115	1	120109798	+	in gene
3158	HMGCS2	SNP_A-8651632	rs12563433	1	120110498	+	in gene
3158	HMGCS2	SNP_A-2000341	rs3790692	1	120111391	-	in gene
3158	HMGCS2	SNP_A-8627059	rs1441008	1	120111815	-	in gene
3158	HMGCS2	SNP_A-2242707	rs2289459	1	120113001	+	in gene
3158	HMGCS2	SNP_A-8439846	rs10754419	1	120114727	-	1686
3158	HMGCS2	SNP_A-8467395	rs2582790	1	120116372	-	3331
3158	HMGCS2	SNP_A-1842688	rs10923899	1	120116707	+	3666
3283	HSD3B1	SNP_A-8660599	rs6661258	1	119849170	-	-2179
3283	HSD3B1	SNP_A-2209188	rs6685275	1	119856047	+	in gene
3283	HSD3B1	SNP_A-4202021	rs6428830	1	119856298	+	in gene
3283	HSD3B1	SNP_A-4275504	rs3765944	1	119857467	+	in gene
3283	HSD3B1	SNP_A-8627319	rs6673653	1	119857924	-	in gene
3283	HSD3B1	SNP_A-8543385	rs6205	1	119858525	-	in gene
3283	HSD3B1	SNP_A-8321910	rs10754400	1	119859505	-	301
3283	HSD3B1	SNP_A-2142927	rs7535128	1	119860444	-	1240
3283	HSD3B1	SNP_A-2236437	rs10923844	1	119861023	-	1819
3283	HSD3B1	SNP_A-1896626	rs6684370	1	119861171	-	1967
3283	HSD3B1	SNP_A-8403015	rs6676283	1	119861617	-	2413
27129	HSPB7	SNP_A-1889207	rs1763610	1	16208114	+	-4997
27129	HSPB7	SNP_A-2212723	rs1739836	1	16209839	-	-3272
27129	HSPB7	SNP_A-8350486	rs872222	1	16217251	+	in gene
27129	HSPB7	SNP_A-4288271	rs1056207	1	16217414	-	in gene
27129	HSPB7	SNP_A-8423503	rs3754329	1	16217842	-	304
55699	IARS2	SNP_A-8451649	rs12136801	1	218329682	+	-4396
55699	IARS2	SNP_A-8627593	rs904327	1	218329697	-	-4381
55699	IARS2	SNP_A-8635536	rs2789788	1	218342001	-	in gene
55699	IARS2	SNP_A-1873242	rs17563518	1	218342927	-	in gene
55699	IARS2	SNP_A-8661872	rs2789789	1	218342956	+	in gene
55699	IARS2	SNP_A-8373948	rs11807333	1	218342973	+	in gene
55699	IARS2	SNP_A-4216284	rs2808022	1	218368740	-	in gene
23095	KIF1B	SNP_A-8294368	rs6671413	1	10204271	+	in gene
23095	KIF1B	SNP_A-1809740	rs4846198	1	10204773	+	in gene
23095	KIF1B	SNP_A-8381483	rs12069853	1	10219105	-	in gene
23095	KIF1B	SNP_A-4248364	rs4240911	1	10230040	-	in gene
23095	KIF1B	SNP_A-1929772	rs946503	1	10231218	-	in gene
23095	KIF1B	SNP_A-2167470	rs946501	1	10232167	-	in gene
23095	KIF1B	SNP_A-2270634	rs17034615	1	10234464	+	in gene
23095	KIF1B	SNP_A-8696904	rs12407992	1	10234570	+	in gene
23095	KIF1B	SNP_A-1843254	rs12064209	1	10248771	-	in gene
23095	KIF1B	SNP_A-2031342	rs9332414	1	10249550	+	in gene
23095	KIF1B	SNP_A-2213974	rs17034643	1	10254689	-	in gene
23095	KIF1B	SNP_A-8386459	rs17034655	1	10264582	-	in gene
23095	KIF1B	SNP_A-8377811	rs6541088	1	10264756	+	in gene
23095	KIF1B	SNP_A-1792861	rs12120042	1	10267912	-	in gene
23095	KIF1B	SNP_A-2045752	rs17397129	1	10268049	-	in gene
23095	KIF1B	SNP_A-2281991	rs12120191	1	10268359	-	in gene
23095	KIF1B	SNP_A-2282048	rs746881	1	10269397	-	in gene
23095	KIF1B	SNP_A-4216845	rs912962	1	10271299	-	in gene
23095	KIF1B	SNP_A-2282422	rs10492972	1	10275699	-	in gene
23095	KIF1B	SNP_A-2132507	rs3748577	1	10279993	-	in gene
23095	KIF1B	SNP_A-2038488	rs17401966	1	10308058	-	in gene
23095	KIF1B	SNP_A-8715915	rs17034735	1	10309229	+	in gene
23095	KIF1B	SNP_A-1944986	rs17034738	1	10309469	+	in gene
23095	KIF1B	SNP_A-2284986	rs4333852	1	10310291	-	in gene
23095	KIF1B	SNP_A-4301459	rs4475756	1	10310375	+	in gene
23095	KIF1B	SNP_A-2242193	rs12734551	1	10314123	-	in gene
23095	KIF1B	SNP_A-8558363	rs17034762	1	10320486	-	in gene
23095	KIF1B	SNP_A-2281792	rs1555849	1	10323189	-	in gene
23095	KIF1B	SNP_A-2216765	rs1556917	1	10323577	-	in gene
23095	KIF1B	SNP_A-1928262	rs11121543	1	10326770	-	in gene
23095	KIF1B	SNP_A-8370312	rs1467653	1	10335710	+	in gene
23095	KIF1B	SNP_A-1948295	rs3748578	1	10343505	+	in gene
23095	KIF1B	SNP_A-8714964	rs12125492	1	10344465	+	in gene
51102	MECR	SNP_A-8475792	rs399891	1	29390832	-	-1140
51102	MECR	SNP_A-2194719	rs3103882	1	29390880	-	-1092
51102	MECR	SNP_A-8466043	rs12032476	1	29402530	+	in gene
51102	MECR	SNP_A-8429762	rs2452785	1	29406188	-	in gene
51102	MECR	SNP_A-8437168	rs16838010	1	29408863	+	in gene
51102	MECR	SNP_A-1813564	rs16838019	1	29413119	-	in gene
51102	MECR	SNP_A-2243355	rs2503009	1	29432200	+	2159
51102	MECR	SNP_A-1848626	rs2503006	1	29434657	+	4616
9927	MFN2	SNP_A-8307406	rs2236055	1	11964848	+	in gene
9927	MFN2	SNP_A-8628905	rs4240897	1	11965342	+	in gene
9927	MFN2	SNP_A-8396801	rs1474868	1	11966751	-	in gene
9927	MFN2	SNP_A-1932219	rs2336384	1	11968650	-	in gene
9927	MFN2	SNP_A-8298421	rs873458	1	11968676	+	in gene
9927	MFN2	SNP_A-1798880	rs6675934	1	11974992	+	in gene
9927	MFN2	SNP_A-8559896	rs2878677	1	11975851	+	in gene
9927	MFN2	SNP_A-1865709	rs1810563	1	11976617	+	in gene
9927	MFN2	SNP_A-8364495	rs2295281	1	11981999	-	in gene
9927	MFN2	SNP_A-8657488	rs17037564	1	11983456	+	in gene
9927	MFN2	SNP_A-8529821	rs3766742	1	11987757	+	in gene
9927	MFN2	SNP_A-8682611	rs3766741	1	11994020	+	in gene
25974	MMACHC	SNP_A-8640703	rs4660864	1	45739169	-	in gene
25974	MMACHC	SNP_A-1785094	rs2275276	1	45746515	-	in gene
25974	MMACHC	SNP_A-2009808	rs4660306	1	45751262	+	1936
25974	MMACHC	SNP_A-4214925	rs16832557	1	45751510	-	2184
25974	MMACHC	SNP_A-8333656	rs16832559	1	45751560	-	2234
25974	MMACHC	SNP_A-8583753	rs2356559	1	45754099	-	4773
64757	MOSC1	SNP_A-1902931	rs746767	1	219025582	+	-1312
64757	MOSC1	SNP_A-1900644	rs7536276	1	219027538	+	in gene
64757	MOSC1	SNP_A-8670184	rs1874117	1	219031092	+	in gene
64757	MOSC1	SNP_A-1958148	rs6682431	1	219031160	-	in gene
64757	MOSC1	SNP_A-2138071	rs1874116	1	219031227	-	in gene
64757	MOSC1	SNP_A-2000717	rs1874115	1	219031262	+	in gene
64757	MOSC1	SNP_A-4211593	rs953970	1	219031421	+	in gene
64757	MOSC1	SNP_A-1985579	rs12562744	1	219033907	-	in gene
64757	MOSC1	SNP_A-4273174	rs6672013	1	219037007	-	in gene
64757	MOSC1	SNP_A-1865598	rs2270535	1	219037064	-	in gene
64757	MOSC1	SNP_A-1899728	rs6687366	1	219037105	-	in gene
64757	MOSC1	SNP_A-8548887	rs2642439	1	219037122	-	in gene
64757	MOSC1	SNP_A-2187870	rs2807834	1	219037216	-	in gene
64757	MOSC1	SNP_A-1847959	rs2807835	1	219037671	+	in gene
64757	MOSC1	SNP_A-1852179	rs3738178	1	219037962	+	in gene
64757	MOSC1	SNP_A-8670189	rs12033808	1	219038457	-	in gene
64757	MOSC1	SNP_A-8670190	rs883847	1	219038951	-	in gene
64757	MOSC1	SNP_A-8670191	rs17008775	1	219039825	+	in gene
64757	MOSC1	SNP_A-1795410	rs2642440	1	219040006	-	in gene
64757	MOSC1	SNP_A-8564744	rs12045953	1	219040121	-	in gene
64757	MOSC1	SNP_A-8379358	rs2642442	1	219040186	-	in gene
64757	MOSC1	SNP_A-8625653	rs2642446	1	219041724	-	in gene
64757	MOSC1	SNP_A-8695531	rs2642420	1	219044273	+	in gene
64757	MOSC1	SNP_A-8369540	rs2242358	1	219044588	-	in gene
64757	MOSC1	SNP_A-8331139	rs2642418	1	219045870	-	in gene
64757	MOSC1	SNP_A-8518091	rs17008835	1	219046052	-	in gene
64757	MOSC1	SNP_A-1797377	rs1874114	1	219046560	-	in gene
64757	MOSC1	SNP_A-4276626	rs10863566	1	219047168	-	in gene
64757	MOSC1	SNP_A-4302459	rs6541160	1	219047981	+	in gene
64757	MOSC1	SNP_A-8671993	rs17649913	1	219050025	-	in gene
64757	MOSC1	SNP_A-8459238	rs11118607	1	219050987	-	in gene
64757	MOSC1	SNP_A-4265584	rs903319	1	219052434	-	in gene
64757	MOSC1	SNP_A-8701311	rs7524572	1	219052451	+	in gene
64757	MOSC1	SNP_A-2252705	rs11118609	1	219055113	-	760
64757	MOSC1	SNP_A-8549382	rs2807842	1	219055560	+	1207
64757	MOSC1	SNP_A-1985585	rs12406881	1	219055953	+	1600
54996	MOSC2	SNP_A-8524415	rs189231	1	218985576	+	-2723
54996	MOSC2	SNP_A-2200445	rs2172699	1	218991767	-	in gene
54996	MOSC2	SNP_A-8565882	rs443071	1	218991864	-	in gene
54996	MOSC2	SNP_A-8651673	rs365346	1	218992461	-	in gene
54996	MOSC2	SNP_A-8304658	rs1690716	1	218994134	-	in gene
54996	MOSC2	SNP_A-2169183	rs10863562	1	218995778	+	in gene
54996	MOSC2	SNP_A-1985552	rs1494373	1	218995979	-	in gene
54996	MOSC2	SNP_A-1985553	rs453079	1	218996024	+	in gene
54996	MOSC2	SNP_A-8670173	rs447861	1	218996115	-	in gene
54996	MOSC2	SNP_A-8386986	rs6659246	1	218997850	+	in gene
54996	MOSC2	SNP_A-4211590	rs3820354	1	218999723	+	in gene
54996	MOSC2	SNP_A-8351148	rs3795535	1	219002995	+	in gene
54996	MOSC2	SNP_A-8598607	rs774149	1	219006371	+	in gene
54996	MOSC2	SNP_A-4243630	rs337147	1	219007034	-	in gene
54996	MOSC2	SNP_A-4253910	rs12026813	1	219007092	+	in gene
54996	MOSC2	SNP_A-8557774	rs337148	1	219007496	-	in gene
54996	MOSC2	SNP_A-8356472	rs11118598	1	219008067	-	in gene
54996	MOSC2	SNP_A-8639941	rs12021979	1	219009564	+	in gene
54996	MOSC2	SNP_A-8417536	rs17008613	1	219010204	+	in gene
54996	MOSC2	SNP_A-8678805	rs6697965	1	219010424	-	in gene
54996	MOSC2	SNP_A-4297600	rs7556458	1	219011913	+	in gene
54996	MOSC2	SNP_A-8530780	rs7542648	1	219012012	+	in gene
54996	MOSC2	SNP_A-8413860	rs9970394	1	219016303	+	in gene
54996	MOSC2	SNP_A-1938022	rs11118603	1	219017628	-	in gene
54996	MOSC2	SNP_A-1845637	rs6657944	1	219017758	+	in gene
54996	MOSC2	SNP_A-8361142	rs17008680	1	219019933	+	in gene
54996	MOSC2	SNP_A-2065304	rs12030249	1	219021143	-	in gene
54996	MOSC2	SNP_A-1877365	rs3767324	1	219021256	-	in gene
54996	MOSC2	SNP_A-1902931	rs746767	1	219025582	+	1360
54996	MOSC2	SNP_A-1900644	rs7536276	1	219027538	+	3316
55052	MRPL20	SNP_A-8622084	rs1240743	1	1323299	+	-3860
79590	MRPL24	SNP_A-4250083	rs6670122	1	154974399	-	in gene
51253	MRPL37	SNP_A-8374746	rs12038480	1	54435745	-	-2683
51253	MRPL37	SNP_A-8484480	rs946447	1	54437712	-	-716
51253	MRPL37	SNP_A-1786446	rs1890566	1	54440866	-	in gene
51253	MRPL37	SNP_A-2194732	rs17110087	1	54441150	-	in gene
51253	MRPL37	SNP_A-8488406	rs11804121	1	54441638	+	in gene
51253	MRPL37	SNP_A-8343318	rs17392549	1	54450374	+	in gene
51253	MRPL37	SNP_A-8287276	rs3766457	1	54450450	+	in gene
51253	MRPL37	SNP_A-1904778	rs11206304	1	54451907	-	in gene
51253	MRPL37	SNP_A-2239826	rs4927071	1	54452500	+	in gene
51253	MRPL37	SNP_A-8603752	rs10888840	1	54456001	+	in gene
51253	MRPL37	SNP_A-2241499	rs10888841	1	54459653	-	3014
128308	MRPL55	SNP_A-8309994	rs849749	1	226363368	+	in gene
65005	MRPL9	SNP_A-8637118	rs6692364	1	149996686	-	-2061
65005	MRPL9	SNP_A-8458455	rs10888433	1	149999324	+	in gene
65005	MRPL9	SNP_A-4300648	rs16833538	1	150001314	+	in gene
65005	MRPL9	SNP_A-8627584	rs12066445	1	150007044	-	4380
63931	MRPS14	SNP_A-8633677	rs16847706	1	173249830	-	in gene
63931	MRPS14	SNP_A-8460698	rs1058741	1	173250256	+	in gene
63931	MRPS14	SNP_A-4209496	rs10489331	1	173251420	+	in gene
63931	MRPS14	SNP_A-4209497	rs10489330	1	173251508	-	in gene
64960	MRPS15	SNP_A-2022115	rs11811387	1	36689888	-	-4072
64960	MRPS15	SNP_A-4227803	rs16823037	1	36693540	-	-420
64960	MRPS15	SNP_A-8506279	rs12048722	1	36695546	-	in gene
64960	MRPS15	SNP_A-8433241	rs16823042	1	36695619	+	in gene
64960	MRPS15	SNP_A-8360281	rs6425987	1	36697263	+	in gene
64960	MRPS15	SNP_A-8656021	rs3806289	1	36702575	-	19
64960	MRPS15	SNP_A-1849624	rs2275472	1	36707254	+	4698
54460	MRPS21	SNP_A-2074904	rs12139286	1	148529079	-	-3814
54460	MRPS21	SNP_A-8537289	rs1776273	1	148536833	-	in gene
54460	MRPS21	SNP_A-2218661	rs16835865	1	148537291	+	in gene
54460	MRPS21	SNP_A-2054987	rs7511649	1	148537415	-	in gene
54460	MRPS21	SNP_A-1966442	rs16835872	1	148541971	-	in gene
54460	MRPS21	SNP_A-8576804	rs509345	1	148542646	+	in gene
54460	MRPS21	SNP_A-8462125	rs12403795	1	148545013	-	in gene
54460	MRPS21	SNP_A-2214270	rs16835911	1	148545957	-	in gene
4580	MTX1	SNP_A-8497298	rs3738808	1	153447090	-	in gene
79594	MUL1	SNP_A-8408498	rs12076947	1	20694552	-	-3978
79594	MUL1	SNP_A-8480290	rs11589084	1	20695334	+	-3196
79594	MUL1	SNP_A-8708474	rs1152987	1	20697951	+	-579
79594	MUL1	SNP_A-8626674	rs1044332	1	20698830	-	in gene
79594	MUL1	SNP_A-8326604	rs2641114	1	20702147	+	in gene
79594	MUL1	SNP_A-8654130	rs640244	1	20702662	+	in gene
79594	MUL1	SNP_A-1921149	rs17412284	1	20702714	+	in gene
79594	MUL1	SNP_A-4251202	rs610763	1	20707325	-	84
79594	MUL1	SNP_A-8348769	rs11589696	1	20708581	-	1340
4595	MUTYH	SNP_A-8368727	rs10890324	1	45563741	+	-3760
4595	MUTYH	SNP_A-1797657	rs7535487	1	45563776	-	-3725
4595	MUTYH	SNP_A-8533590	rs3219497	1	45567614	+	in gene
4595	MUTYH	SNP_A-1923869	rs3219495	1	45568702	-	in gene
4595	MUTYH	SNP_A-1842139	rs3219487	1	45571142	-	in gene
4595	MUTYH	SNP_A-8649469	rs3219484	1	45572743	+	in gene
4595	MUTYH	SNP_A-4291316	rs3219472	1	45576637	-	in gene
4595	MUTYH	SNP_A-2284446	rs9429072	1	45582678	-	3949
4720	NDUFS2	SNP_A-4302205	rs3813623	1	159435789	+	in gene
4720	NDUFS2	SNP_A-4251458	rs3813624	1	159437601	+	in gene
4720	NDUFS2	SNP_A-4247841	rs10908826	1	159439149	-	in gene
4720	NDUFS2	SNP_A-4262884	rs3924264	1	159445308	+	in gene
4720	NDUFS2	AFFX-SNP_160925	rs3924264	1	159445308	+	in gene
4720	NDUFS2	SNP_A-1968890	rs41428447	1	159445922	-	in gene
4720	NDUFS2	SNP_A-4262885	rs4656994	1	159446501	+	in gene
4720	NDUFS2	SNP_A-8525940	rs1136224	1	159450721	-	in gene
4720	NDUFS2	SNP_A-1888067	rs3557	1	159455517	-	4708
4720	NDUFS2	SNP_A-8445798	rs11421	1	159455560	+	4751
4725	NDUFS5	SNP_A-2040944	rs1555741	1	39265708	-	in gene
4725	NDUFS5	SNP_A-8472846	rs7554800	1	39276430	+	3556
4725	NDUFS5	SNP_A-2090623	rs7554809	1	39276465	-	3591
4725	NDUFS5	SNP_A-1934272	rs6600283	1	39276614	+	3740
4817	NIT1	SNP_A-1923711	rs11265554	1	159350631	-	-3884
4817	NIT1	SNP_A-2257558	rs17389237	1	159359385	+	1904
4898	NRD1	SNP_A-8445030	rs1417365	1	52028071	+	in gene
4898	NRD1	SNP_A-8623669	rs12023878	1	52028663	-	in gene
4898	NRD1	SNP_A-8558138	rs1613430	1	52036470	+	in gene
4898	NRD1	SNP_A-8587424	rs1770791	1	52036652	+	in gene
4898	NRD1	SNP_A-8437454	rs2747526	1	52037432	+	in gene
4898	NRD1	SNP_A-8697525	rs2842581	1	52038708	+	in gene
4898	NRD1	SNP_A-8449962	rs10888734	1	52038830	-	in gene
4898	NRD1	SNP_A-8580724	rs2273198	1	52038938	+	in gene
4898	NRD1	SNP_A-8515703	rs7541944	1	52042644	+	in gene
4898	NRD1	SNP_A-1933848	rs3765832	1	52054072	+	in gene
4898	NRD1	SNP_A-8517873	rs12123333	1	52069647	-	in gene
4898	NRD1	SNP_A-8624604	rs12944	1	52075593	+	in gene
4898	NRD1	SNP_A-2022845	rs2495220	1	52079979	+	in gene
4898	NRD1	SNP_A-2129437	rs6702037	1	52083344	+	in gene
4898	NRD1	SNP_A-8479987	rs7526552	1	52093147	-	in gene
4898	NRD1	SNP_A-8674110	rs11810600	1	52098613	+	in gene
4898	NRD1	SNP_A-8611083	rs6588415	1	52106635	+	in gene
4898	NRD1	SNP_A-8516804	rs12748434	1	52108725	+	in gene
4898	NRD1	SNP_A-2124612	rs2842586	1	52118348	-	1151
4898	NRD1	SNP_A-2074440	rs11205901	1	52120937	+	3740
4898	NRD1	SNP_A-1954844	rs17106862	1	52120976	-	3779
4898	NRD1	SNP_A-1797079	rs17106866	1	52121012	-	3815
4898	NRD1	SNP_A-2149773	rs11205902	1	52121357	+	4160
115209	OMA1	SNP_A-2134166	rs338229	1	58715121	+	-3858
115209	OMA1	SNP_A-2182400	rs338228	1	58715618	+	-3361
115209	OMA1	SNP_A-2200364	rs168101	1	58715763	-	-3216
115209	OMA1	SNP_A-1804869	rs10889097	1	58716083	+	-2896
115209	OMA1	SNP_A-8406800	rs338225	1	58721474	+	in gene
115209	OMA1	SNP_A-2194511	rs618043	1	58724809	+	in gene
115209	OMA1	SNP_A-1865246	rs6687324	1	58724834	-	in gene
115209	OMA1	SNP_A-2056766	rs17096872	1	58745260	-	in gene
115209	OMA1	SNP_A-8373846	rs17117608	1	58751746	+	in gene
115209	OMA1	SNP_A-1864671	rs17117627	1	58753077	+	in gene
115209	OMA1	SNP_A-1876181	rs11581395	1	58755375	-	in gene
115209	OMA1	SNP_A-8350274	rs12030713	1	58759558	+	in gene
115209	OMA1	SNP_A-2137443	rs7355030	1	58760416	+	in gene
115209	OMA1	SNP_A-2056227	rs2271004	1	58768791	-	in gene
115209	OMA1	SNP_A-4236572	rs17096876	1	58772644	-	in gene
115209	OMA1	SNP_A-8344788	rs6667614	1	58773888	+	in gene
115209	OMA1	SNP_A-1837379	rs17117699	1	58774870	+	in gene
115209	OMA1	SNP_A-8383475	rs17117702	1	58774907	+	in gene
115209	OMA1	SNP_A-1938798	rs7548097	1	58775048	-	in gene
115209	OMA1	SNP_A-1909416	rs6587829	1	58775113	-	in gene
115209	OMA1	SNP_A-2187658	rs6684553	1	58775554	+	in gene
115209	OMA1	SNP_A-2178157	rs6698355	1	58775700	+	in gene
115209	OMA1	SNP_A-8370379	rs902925	1	58777567	+	in gene
115209	OMA1	SNP_A-2049646	rs12139475	1	58777775	-	in gene
115209	OMA1	SNP_A-2061147	rs7535313	1	58777979	+	in gene
115209	OMA1	SNP_A-1796951	rs17117747	1	58783326	-	in gene
11315	PARK7	SNP_A-8603122	rs226249	1	7944365	-	-15
11315	PARK7	SNP_A-8489695	rs178932	1	7952887	+	in gene
11315	PARK7	SNP_A-8571679	rs6703670	1	7953443	-	in gene
11315	PARK7	SNP_A-2185717	rs7516775	1	7955163	+	in gene
11315	PARK7	SNP_A-8674033	rs161808	1	7958301	+	in gene
11315	PARK7	SNP_A-8447549	rs161807	1	7960083	-	in gene
11315	PARK7	SNP_A-1912515	rs161801	1	7965323	+	in gene
25973	PARS2	SNP_A-2187202	rs1180967	1	54990322	+	-4837
25973	PARS2	SNP_A-2219908	rs1180966	1	54990392	-	-4767
25973	PARS2	SNP_A-2210164	rs17111010	1	54990560	+	-4599
25973	PARS2	SNP_A-8386915	rs12092772	1	54990618	+	-4541
25973	PARS2	SNP_A-8546117	rs2108035	1	54990743	+	-4416
25973	PARS2	SNP_A-8365626	rs2764822	1	54994668	-	-491
25973	PARS2	SNP_A-2114641	rs1180955	1	54998434	-	in gene
25973	PARS2	SNP_A-8693450	rs2057939	1	55000168	-	in gene
25973	PARS2	SNP_A-4227106	rs1180949	1	55000717	-	in gene
25973	PARS2	SNP_A-2207813	rs1180948	1	55000747	-	in gene
25973	PARS2	SNP_A-8398348	rs2301940	1	55002900	-	125
25973	PARS2	SNP_A-4281899	rs1180939	1	55007108	-	4333
25973	PARS2	SNP_A-1788580	rs10430114	1	55007299	+	4524
8799	PEX11B	SNP_A-4241865	rs12239611	1	144232707	+	in gene
8799	PEX11B	SNP_A-1946088	rs12239855	1	144232761	-	in gene
65018	PINK1	SNP_A-4201715	rs10916837	1	20827770	+	-4765
65018	PINK1	SNP_A-8582810	rs35731336	1	20834138	+	in gene
65018	PINK1	SNP_A-8581245	rs3102072	1	20836653	-	in gene
65018	PINK1	SNP_A-4255519	rs2298296	1	20836829	+	in gene
65018	PINK1	SNP_A-1823064	rs2298298	1	20836915	-	in gene
65018	PINK1	SNP_A-1796945	rs3102071	1	20840598	+	in gene
65018	PINK1	SNP_A-4272509	rs2298299	1	20847389	-	in gene
65018	PINK1	SNP_A-1904223	rs2298300	1	20848050	+	in gene
65018	PINK1	SNP_A-8614644	rs17414302	1	20849122	-	in gene
65018	PINK1	SNP_A-2156249	rs1043424	1	20849587	+	in gene
65018	PINK1	SNP_A-4200528	rs1043443	1	20849967	+	in gene
65018	PINK1	SNP_A-8400339	rs8064	1	20850186	-	in gene
65018	PINK1	SNP_A-1877349	rs16824318	1	20850261	+	in gene
65018	PINK1	SNP_A-4192865	rs1043502	1	20850335	-	in gene
65018	PINK1	SNP_A-4277777	rs650616	1	20850645	-	54
65018	PINK1	SNP_A-4300279	rs10916843	1	20850724	+	133
65018	PINK1	SNP_A-1940571	rs622525	1	20852405	+	1814
65018	PINK1	SNP_A-1944769	rs2070660	1	20853037	-	2446
5498	PPOX	SNP_A-8428656	rs11579514	1	159409936	-	2302
5498	PPOX	SNP_A-2245671	rs3813620	1	159411629	+	3995
5052	PRDX1	SNP_A-1785094	rs2275276	1	45746515	-	-2779
5052	PRDX1	SNP_A-2009808	rs4660306	1	45751262	+	in gene
5052	PRDX1	SNP_A-4214925	rs16832557	1	45751510	-	in gene
5052	PRDX1	SNP_A-8333656	rs16832559	1	45751560	-	in gene
5052	PRDX1	SNP_A-8583753	rs2356559	1	45754099	-	in gene
5052	PRDX1	SNP_A-2048524	rs6699702	1	45754421	+	in gene
5052	PRDX1	SNP_A-2260965	rs10736426	1	45756940	+	in gene
5052	PRDX1	SNP_A-8715489	rs11211133	1	45763666	+	3470
5052	PRDX1	SNP_A-1795187	rs7522705	1	45764887	-	4691
5052	PRDX1	SNP_A-2203865	rs945179	1	45765047	-	4851
9588	PRDX6	SNP_A-8289423	rs4916362	1	171708256	+	-4853
9588	PRDX6	SNP_A-1799932	rs9425722	1	171711268	+	-1841
9588	PRDX6	SNP_A-1881244	rs7540065	1	171715659	+	in gene
6301	SARS	SNP_A-1794710	rs17643426	1	109556241	+	-1822
6301	SARS	SNP_A-8295009	rs685653	1	109561299	-	in gene
6301	SARS	SNP_A-8535886	rs687074	1	109561671	-	in gene
6301	SARS	SNP_A-1854292	rs682612	1	109567392	+	in gene
6301	SARS	SNP_A-1796234	rs3120625	1	109570412	+	in gene
6301	SARS	SNP_A-8524203	rs600711	1	109575549	+	in gene
6301	SARS	SNP_A-1795268	rs4268379	1	109579760	-	in gene
6301	SARS	SNP_A-8295521	rs602265	1	109583104	-	796
6301	SARS	SNP_A-1957739	rs611945	1	109583526	+	1218
6301	SARS	SNP_A-4261076	rs611905	1	109583560	+	1252
6301	SARS	SNP_A-1957751	rs6656935	1	109583744	+	1436
51097	SCCPDH	SNP_A-8686340	rs7416239	1	244952204	+	-1797
51097	SCCPDH	SNP_A-8699869	rs6697433	1	244952888	+	-1113
51097	SCCPDH	SNP_A-8314553	rs3007319	1	244959449	-	in gene
51097	SCCPDH	SNP_A-2056035	rs7526237	1	244964757	-	in gene
51097	SCCPDH	SNP_A-1955720	rs7513496	1	244973829	-	in gene
51097	SCCPDH	SNP_A-8538359	rs7366187	1	244979311	+	in gene
51097	SCCPDH	SNP_A-8708621	rs7527938	1	244980940	-	in gene
51097	SCCPDH	SNP_A-8318779	rs3007324	1	244981563	-	in gene
51097	SCCPDH	SNP_A-2189954	rs3007326	1	244984420	+	in gene
51097	SCCPDH	SNP_A-2000879	rs4532864	1	244993222	-	in gene
51097	SCCPDH	SNP_A-1850582	rs4926450	1	244995806	-	in gene
51097	SCCPDH	SNP_A-2181401	rs7779	1	244997187	+	in gene
51097	SCCPDH	SNP_A-1933388	rs10924823	1	244998415	-	353
51097	SCCPDH	SNP_A-8359771	rs10924824	1	244998447	+	385
51097	SCCPDH	SNP_A-1892827	rs4926453	1	244998481	+	419
51097	SCCPDH	SNP_A-2243885	rs7513803	1	244998973	-	911
6342	SCP2	SNP_A-4274013	rs12088520	1	53171148	+	in gene
6342	SCP2	SNP_A-2305198	rs12076197	1	53182161	-	in gene
6342	SCP2	SNP_A-4204696	rs17107484	1	53182976	-	in gene
6342	SCP2	SNP_A-1894519	rs11206047	1	53184801	-	in gene
6342	SCP2	SNP_A-2309363	rs12060111	1	53185357	+	in gene
6342	SCP2	SNP_A-8557024	rs13375034	1	53196895	-	in gene
6342	SCP2	SNP_A-8597795	rs12090238	1	53197296	+	in gene
6342	SCP2	SNP_A-4198459	rs7528867	1	53226518	-	in gene
6342	SCP2	SNP_A-1908642	rs11206061	1	53228487	-	in gene
6342	SCP2	SNP_A-8355468	rs17107527	1	53229596	+	in gene
6342	SCP2	SNP_A-8304443	rs7541215	1	53230058	-	in gene
6342	SCP2	SNP_A-2013560	rs6697076	1	53231950	-	in gene
6342	SCP2	SNP_A-4215346	rs11581638	1	53232278	-	in gene
6342	SCP2	SNP_A-1787113	rs17107541	1	53234926	-	in gene
6342	SCP2	SNP_A-8319561	rs6662480	1	53242304	-	in gene
6342	SCP2	SNP_A-4233965	rs6679819	1	53249558	+	in gene
6342	SCP2	SNP_A-2052819	rs7529265	1	53253333	-	in gene
6342	SCP2	SNP_A-4195920	rs7546714	1	53261152	-	in gene
6342	SCP2	SNP_A-2263237	rs7555050	1	53261720	+	in gene
6342	SCP2	SNP_A-4193379	rs7549603	1	53261884	+	in gene
6342	SCP2	SNP_A-2082243	rs17107624	1	53262256	-	in gene
6342	SCP2	SNP_A-8398669	rs17107643	1	53266410	+	in gene
6342	SCP2	SNP_A-2032312	rs17107654	1	53267467	+	in gene
6342	SCP2	SNP_A-4249549	rs6588458	1	53283563	-	in gene
6342	SCP2	SNP_A-1861115	rs13376501	1	53284873	+	in gene
6342	SCP2	SNP_A-1827161	rs11588200	1	53285107	+	in gene
6342	SCP2	SNP_A-2038394	rs2896792	1	53286570	-	in gene
6342	SCP2	SNP_A-2303816	rs6664845	1	53287085	-	in gene
6342	SCP2	SNP_A-1882158	rs3766762	1	53287104	-	in gene
6342	SCP2	SNP_A-1899211	rs4926946	1	53287689	+	in gene
6342	SCP2	SNP_A-8448451	rs3766764	1	53287893	-	in gene
6342	SCP2	SNP_A-8324631	rs12095520	1	53288582	-	in gene
6342	SCP2	SNP_A-8562991	rs10888761	1	53288971	-	in gene
6342	SCP2	SNP_A-2168928	rs17107767	1	53290585	+	715
6342	SCP2	SNP_A-2037051	rs12096165	1	53290637	+	767
6390	SDHB	SNP_A-1903053	rs2647168	1	17213465	+	-4339
6390	SDHB	SNP_A-2190266	rs9435739	1	17215511	+	-2293
6390	SDHB	SNP_A-1788452	rs761420	1	17221434	-	in gene
6390	SDHB	SNP_A-4282720	rs1022580	1	17232263	+	in gene
6390	SDHB	SNP_A-8470135	rs4920653	1	17239458	+	in gene
6390	SDHB	SNP_A-2048715	rs2647169	1	17243810	-	in gene
6390	SDHB	SNP_A-2256849	rs732679	1	17244272	-	in gene
6390	SDHB	SNP_A-4201549	rs10887994	1	17244342	+	in gene
6390	SDHB	SNP_A-2253781	rs11203287	1	17244984	+	in gene
6390	SDHB	SNP_A-1836494	rs7536679	1	17247250	+	in gene
6390	SDHB	SNP_A-2034806	rs7545499	1	17247275	-	in gene
6390	SDHB	SNP_A-2048646	rs7545518	1	17247329	-	in gene
6390	SDHB	SNP_A-4280603	rs6586496	1	17250815	+	in gene
6390	SDHB	SNP_A-2093790	rs2235928	1	17251616	+	in gene
6390	SDHB	SNP_A-8428854	rs2746460	1	17254893	+	1641
6390	SDHB	SNP_A-8527540	rs2647209	1	17255149	+	1897
6390	SDHB	SNP_A-4242616	rs3754507	1	17255533	+	2281
6391	SDHC	SNP_A-8466675	rs16832801	1	159547992	+	-2798
6391	SDHC	SNP_A-8579679	rs4131826	1	159549008	-	-1782
6391	SDHC	SNP_A-8683715	rs17398689	1	159549483	-	-1307
6391	SDHC	SNP_A-1863299	rs16832813	1	159553345	+	in gene
6391	SDHC	SNP_A-8417026	rs7412460	1	159574531	+	in gene
6391	SDHC	SNP_A-8579684	rs16832859	1	159599872	-	in gene
6391	SDHC	SNP_A-2067526	rs16832871	1	159602382	+	1217
6391	SDHC	SNP_A-2028868	rs16832872	1	159602526	+	1361
6391	SDHC	SNP_A-1926571	rs16832883	1	159604870	-	3705
6566	SLC16A1	SNP_A-2310365	rs41510545	1	113251900	-	-4092
6566	SLC16A1	SNP_A-1899536	rs7551223	1	113254136	-	-1856
6566	SLC16A1	SNP_A-2077777	rs1049434	1	113258069	-	in gene
6566	SLC16A1	SNP_A-8549552	rs17030816	1	113298241	-	in gene
29957	SLC25A24	SNP_A-1911307	rs2000260	1	108474928	+	-4040
29957	SLC25A24	SNP_A-2304791	rs11185280	1	108482270	+	in gene
29957	SLC25A24	SNP_A-1883283	rs11185282	1	108483005	-	in gene
29957	SLC25A24	SNP_A-4230934	rs11185283	1	108494257	+	in gene
29957	SLC25A24	SNP_A-4207654	rs12047398	1	108494828	+	in gene
29957	SLC25A24	SNP_A-1949908	rs10494090	1	108494859	+	in gene
29957	SLC25A24	SNP_A-8288223	rs6693028	1	108495892	+	in gene
29957	SLC25A24	SNP_A-1949917	rs591141	1	108496417	-	in gene
29957	SLC25A24	SNP_A-8526771	rs10881508	1	108499621	+	in gene
29957	SLC25A24	SNP_A-2295224	rs829004	1	108512791	-	in gene
29957	SLC25A24	SNP_A-8672792	rs9325363	1	108515080	+	in gene
29957	SLC25A24	SNP_A-8412968	rs632477	1	108518916	+	in gene
29957	SLC25A24	SNP_A-2028633	rs662590	1	108521095	+	in gene
29957	SLC25A24	SNP_A-8521722	rs597358	1	108531282	+	in gene
29957	SLC25A24	SNP_A-4246708	rs533233	1	108540627	-	in gene
29957	SLC25A24	AFFX-SNP_10716084	rs533233	1	108540627	-	in gene
29957	SLC25A24	SNP_A-4254814	rs685847	1	108540694	-	in gene
29957	SLC25A24	SNP_A-8398553	rs11584987	1	108545037	-	540
29957	SLC25A24	SNP_A-8295131	rs12118768	1	108545414	+	917
29957	SLC25A24	SNP_A-8369586	rs828999	1	108546457	+	1960
29957	SLC25A24	SNP_A-8537013	rs864892	1	108546526	+	2029
29957	SLC25A24	SNP_A-8367907	rs6686613	1	108546762	+	2265
29957	SLC25A24	SNP_A-8412740	rs12065691	1	108546778	-	2281
29957	SLC25A24	SNP_A-2302781	rs17021210	1	108547196	+	2699
29957	SLC25A24	SNP_A-1950433	rs17574098	1	108547274	+	2777
84275	SLC25A33	SNP_A-8476885	rs6664362	1	9536458	-	in gene
84275	SLC25A33	SNP_A-2201522	rs9430274	1	9546872	-	in gene
84275	SLC25A33	AFFX-SNP_8199384	rs9430274	1	9546872	-	in gene
84275	SLC25A33	SNP_A-1833257	rs9430155	1	9560178	-	in gene
84275	SLC25A33	SNP_A-2057029	rs9430174	1	9569724	-	4306
284723	SLC25A34	SNP_A-2069695	rs6682484	1	15932281	+	-3115
9673	SLC25A44	SNP_A-8645165	rs2842879	1	154430319	+	-204
9673	SLC25A44	SNP_A-8695896	rs2241111	1	154430342	-	-181
9673	SLC25A44	SNP_A-2187357	rs2253677	1	154437920	-	in gene
9673	SLC25A44	SNP_A-4268101	rs2241110	1	154439111	-	in gene
9673	SLC25A44	SNP_A-4268102	rs2842861	1	154439123	-	in gene
9673	SLC25A44	SNP_A-2000367	rs2853641	1	154448394	+	in gene
9673	SLC25A44	SNP_A-1967473	rs2075163	1	154448457	-	in gene
9673	SLC25A44	SNP_A-1809085	rs2241107	1	154449334	+	123
80222	TARS2	SNP_A-2109472	rs4451552	1	148722478	-	-4066
80222	TARS2	SNP_A-2121605	rs4446975	1	148722793	+	-3751
80222	TARS2	SNP_A-1966499	rs7542068	1	148730396	-	in gene
80222	TARS2	SNP_A-8695712	rs7548450	1	148732521	+	in gene
80222	TARS2	SNP_A-8354055	rs12116970	1	148733549	+	in gene
80222	TARS2	SNP_A-8331914	rs12724450	1	148747195	-	815
80222	TARS2	SNP_A-1818513	rs9661040	1	148749860	+	3480
128387	TATDN3	SNP_A-2113623	rs17019726	1	211035751	-	in gene
128387	TATDN3	SNP_A-1901150	rs6684313	1	211036619	-	in gene
128387	TATDN3	SNP_A-2303884	rs2359321	1	211039109	+	in gene
128387	TATDN3	SNP_A-1809467	rs12128410	1	211039222	+	in gene
128387	TATDN3	SNP_A-2299833	rs7515115	1	211053177	-	in gene
128387	TATDN3	SNP_A-2134341	rs12734543	1	211058033	-	1442
128387	TATDN3	SNP_A-1949053	rs12124669	1	211061390	+	4799
11022	TDRKH	SNP_A-8627584	rs12066445	1	150007044	-	-3620
11022	TDRKH	SNP_A-8542659	rs1781423	1	150009767	-	-897
11022	TDRKH	SNP_A-8536191	rs6673002	1	150009899	+	-765
11022	TDRKH	SNP_A-8413285	rs2495396	1	150011552	-	in gene
11022	TDRKH	SNP_A-8296948	rs11204885	1	150014594	+	in gene
11022	TDRKH	SNP_A-8577429	rs3923394	1	150015049	-	in gene
11022	TDRKH	SNP_A-4262495	rs3811413	1	150015453	-	in gene
11022	TDRKH	SNP_A-1943227	rs6684101	1	150015935	-	in gene
11022	TDRKH	SNP_A-8395543	rs6679233	1	150017057	-	in gene
11022	TDRKH	SNP_A-8558528	rs6681093	1	150021908	+	in gene
11022	TDRKH	SNP_A-4197888	rs868866	1	150028428	-	in gene
11022	TDRKH	SNP_A-2132898	rs868867	1	150028489	+	in gene
11022	TDRKH	SNP_A-1918557	rs868868	1	150028732	-	in gene
11022	TDRKH	SNP_A-8347189	rs3811414	1	150029870	+	236
64216	TFB2M	SNP_A-1833813	rs3124103	1	244766670	-	-3819
64216	TFB2M	SNP_A-8318394	rs12733455	1	244769015	+	-1474
64216	TFB2M	SNP_A-1894050	rs764243	1	244771186	+	in gene
64216	TFB2M	SNP_A-4225387	rs3120697	1	244771788	-	in gene
64216	TFB2M	SNP_A-1829248	rs3129567	1	244771900	-	in gene
64216	TFB2M	SNP_A-8403215	rs3120698	1	244772079	-	in gene
64216	TFB2M	SNP_A-2178022	rs3120699	1	244772132	+	in gene
64216	TFB2M	SNP_A-2216389	rs4545307	1	244775469	-	in gene
64216	TFB2M	SNP_A-2031744	rs3124124	1	244776714	+	in gene
64216	TFB2M	SNP_A-8640500	rs12735904	1	244778227	+	in gene
64216	TFB2M	SNP_A-1942863	rs10802426	1	244781819	-	in gene
64216	TFB2M	SNP_A-8655205	rs6701836	1	244793633	+	in gene
64216	TFB2M	SNP_A-8374576	rs12062784	1	244800493	+	4307
117145	THEM4	SNP_A-1836583	rs10158030	1	150109303	+	-3381
117145	THEM4	SNP_A-8438114	rs16833610	1	150109668	-	-3016
117145	THEM4	SNP_A-8715515	rs6684312	1	150111274	-	-1410
117145	THEM4	SNP_A-2081654	rs6587627	1	150112683	-	-1
117145	THEM4	SNP_A-8496366	rs13320	1	150113141	+	in gene
117145	THEM4	SNP_A-2277758	rs6587628	1	150116696	-	in gene
117145	THEM4	SNP_A-2296621	rs4845388	1	150120700	-	in gene
117145	THEM4	SNP_A-4206714	rs6685187	1	150125512	+	in gene
117145	THEM4	SNP_A-1818657	rs6685291	1	150125550	-	in gene
117145	THEM4	SNP_A-4257979	rs1003107	1	150128920	+	in gene
117145	THEM4	SNP_A-1920678	rs11204909	1	150129625	+	in gene
117145	THEM4	SNP_A-2215710	rs6691350	1	150143602	-	in gene
117145	THEM4	SNP_A-4195231	rs9943225	1	150147011	+	in gene
284486	THEM5	SNP_A-2000356	rs6587622	1	150081029	-	-3815
284486	THEM5	SNP_A-8568477	rs1000994	1	150083162	-	-1682
284486	THEM5	SNP_A-8647147	rs7544269	1	150083187	-	-1657
284486	THEM5	SNP_A-2195466	rs7536659	1	150083342	+	-1502
284486	THEM5	SNP_A-4193431	rs9645406	1	150083696	-	-1148
284486	THEM5	SNP_A-2113745	rs998454	1	150084622	-	-222
284486	THEM5	SNP_A-8288814	rs6587624	1	150086922	-	in gene
284486	THEM5	SNP_A-8437918	rs923547	1	150088627	-	in gene
284486	THEM5	SNP_A-8415882	rs2279503	1	150090713	+	in gene
284486	THEM5	SNP_A-2224581	rs998501	1	150092196	+	in gene
284486	THEM5	SNP_A-2235605	rs2879130	1	150096722	-	3925
10440	TIMM17A	SNP_A-8536715	rs2790898	1	200186297	+	-4974
10440	TIMM17A	SNP_A-8425735	rs2820306	1	200190428	-	-843
10440	TIMM17A	SNP_A-2229342	rs2820307	1	200192178	-	in gene
10440	TIMM17A	SNP_A-8567820	rs2819374	1	200192792	-	in gene
10440	TIMM17A	SNP_A-2157838	rs34611715	1	200201201	-	in gene
10440	TIMM17A	SNP_A-8691945	rs7537116	1	200202294	+	in gene
10440	TIMM17A	SNP_A-8541657	rs4950802	1	200202788	+	in gene
10440	TIMM17A	SNP_A-2135526	rs1045893	1	200206375	-	in gene
9804	TOMM20	SNP_A-8516428	rs7554276	1	233334640	-	-4643
9804	TOMM20	SNP_A-8630971	rs4567344	1	233337397	-	-1886
9804	TOMM20	SNP_A-8441269	rs7411516	1	233338980	+	-303
9804	TOMM20	SNP_A-8437878	rs11301	1	233339802	+	in gene
9804	TOMM20	SNP_A-4295424	rs7930	1	233339817	-	in gene
84134	TOMM40L	SNP_A-1872340	rs5085	1	159459135	+	-3322
84134	TOMM40L	SNP_A-2265899	rs4073054	1	159467111	+	79
84134	TOMM40L	SNP_A-8494918	rs7527212	1	159469097	+	2065
84134	TOMM40L	SNP_A-1901016	rs2307420	1	159469180	+	2148
84134	TOMM40L	SNP_A-8437066	rs2501873	1	159471162	-	4130
54802	TRIT1	SNP_A-8287199	rs230275	1	40074484	-	-4831
54802	TRIT1	SNP_A-4268921	rs6693041	1	40075050	+	-4265
54802	TRIT1	SNP_A-2275140	rs12123609	1	40076214	+	-3101
54802	TRIT1	SNP_A-2214002	rs6694437	1	40077234	+	-2081
54802	TRIT1	SNP_A-8286959	rs1043843	1	40079452	-	in gene
54802	TRIT1	SNP_A-2005982	rs3768311	1	40080604	-	in gene
54802	TRIT1	SNP_A-2005985	rs1974206	1	40081505	+	in gene
54802	TRIT1	SNP_A-8334109	rs1333742	1	40086436	+	in gene
54802	TRIT1	SNP_A-8334110	rs3738671	1	40088475	+	in gene
54802	TRIT1	SNP_A-8609023	rs2131312	1	40093845	+	in gene
54802	TRIT1	SNP_A-4251123	rs6686137	1	40102968	+	in gene
54802	TRIT1	SNP_A-8510187	rs11587094	1	40115951	-	in gene
54802	TRIT1	SNP_A-1861799	rs10789049	1	40116019	+	in gene
54802	TRIT1	SNP_A-1792554	rs7523024	1	40118588	+	in gene
54802	TRIT1	SNP_A-2090162	rs7533329	1	40118716	-	in gene
7388	UQCRH	SNP_A-2246436	rs4660921	1	46554189	+	in gene
7388	UQCRH	SNP_A-2024506	rs17102133	1	46554779	-	in gene
10352	WARS2	SNP_A-1802367	rs12027986	1	119372788	+	-2574
10352	WARS2	SNP_A-8575767	rs2148150	1	119373580	+	-1782
10352	WARS2	SNP_A-8514193	rs17185989	1	119379448	-	in gene
10352	WARS2	SNP_A-8523640	rs12132585	1	119379470	+	in gene
10352	WARS2	SNP_A-8679541	rs2645295	1	119383971	-	in gene
10352	WARS2	SNP_A-8627075	rs12088290	1	119385449	-	in gene
10352	WARS2	SNP_A-4208257	rs1325939	1	119385491	+	in gene
10352	WARS2	SNP_A-8602856	rs17023171	1	119394791	-	in gene
10352	WARS2	SNP_A-8628524	rs12741635	1	119395344	+	in gene
10352	WARS2	SNP_A-8410252	rs7532510	1	119395759	+	in gene
10352	WARS2	SNP_A-8500891	rs2794311	1	119397472	-	in gene
10352	WARS2	SNP_A-1839353	rs17023183	1	119411706	-	in gene
10352	WARS2	SNP_A-8552664	rs12567198	1	119412287	-	in gene
10352	WARS2	SNP_A-8463080	rs12086549	1	119415860	-	in gene
10352	WARS2	SNP_A-8713908	rs2885226	1	119425686	-	in gene
10352	WARS2	SNP_A-2206120	rs17023211	1	119426490	-	in gene
10352	WARS2	SNP_A-8554835	rs10802074	1	119426519	+	in gene
10352	WARS2	SNP_A-8350651	rs12064114	1	119428648	+	in gene
10352	WARS2	SNP_A-8658180	rs10802075	1	119428750	+	in gene
10352	WARS2	SNP_A-1836243	rs17023224	1	119434378	+	in gene
10352	WARS2	SNP_A-8575779	rs10494221	1	119435747	+	in gene
10352	WARS2	SNP_A-1802119	rs10923748	1	119449469	-	in gene
10352	WARS2	SNP_A-8520751	rs12031585	1	119459461	+	in gene
10352	WARS2	SNP_A-4293691	rs6677940	1	119461372	+	in gene
10352	WARS2	SNP_A-8658340	rs12564953	1	119466652	+	in gene
10352	WARS2	SNP_A-2269258	rs2498500	1	119474616	-	in gene
10352	WARS2	SNP_A-2242129	rs10923755	1	119474867	+	in gene
10352	WARS2	SNP_A-8348802	rs1341583	1	119478773	+	in gene
10352	WARS2	SNP_A-2227680	rs4600087	1	119480924	+	in gene
10352	WARS2	SNP_A-8550210	rs12042797	1	119481613	+	in gene
10352	WARS2	SNP_A-8575781	rs4387216	1	119481819	+	in gene
10352	WARS2	SNP_A-2113173	rs6428798	1	119482490	+	in gene
10352	WARS2	SNP_A-2119545	rs6428799	1	119482520	+	in gene
10058	ABCB6	SNP_A-2091103	rs3731885	2	219792713	-	797
10058	ABCB6	SNP_A-2310092	rs9989854	2	219794524	+	2608
10058	ABCB6	SNP_A-8353271	rs2385397	2	219796040	-	4124
10058	ABCB6	SNP_A-1960955	rs908196	2	219796492	+	4576
10058	ABCB6	SNP_A-8480165	rs2276636	2	219796752	+	4836
33	ACADL	SNP_A-2168774	rs2286963	2	210768295	-	in gene
33	ACADL	SNP_A-1833572	rs16844185	2	210768664	+	in gene
33	ACADL	SNP_A-8478163	rs6739874	2	210769915	-	in gene
33	ACADL	SNP_A-1799270	rs263681	2	210771597	+	in gene
33	ACADL	SNP_A-8334144	rs1509568	2	210777256	-	in gene
33	ACADL	SNP_A-4286343	rs1509571	2	210781793	+	in gene
33	ACADL	SNP_A-2103357	rs3764913	2	210783154	-	in gene
33	ACADL	SNP_A-1862872	rs16844213	2	210787411	-	in gene
33	ACADL	SNP_A-8314211	rs13415601	2	210788369	-	in gene
98	ACYP2	SNP_A-8596042	rs1559040	2	54201254	+	in gene
98	ACYP2	SNP_A-4224334	rs6721970	2	54201406	-	in gene
98	ACYP2	SNP_A-1846523	rs11125521	2	54205862	+	in gene
98	ACYP2	SNP_A-1788633	rs7355768	2	54208781	+	in gene
98	ACYP2	SNP_A-8378760	rs12713254	2	54211907	+	in gene
98	ACYP2	SNP_A-8362380	rs10206954	2	54212021	-	in gene
98	ACYP2	SNP_A-8629263	rs13405053	2	54216095	-	in gene
98	ACYP2	SNP_A-8628023	rs13417064	2	54216230	+	in gene
98	ACYP2	SNP_A-8685631	rs10173565	2	54216442	+	in gene
98	ACYP2	SNP_A-2026408	rs10186140	2	54216479	+	in gene
98	ACYP2	SNP_A-1894558	rs11891079	2	54219798	-	in gene
98	ACYP2	SNP_A-2068431	rs1421618	2	54220109	-	in gene
98	ACYP2	SNP_A-8365702	rs10207892	2	54229898	+	in gene
98	ACYP2	SNP_A-8312723	rs13414565	2	54233071	-	in gene
98	ACYP2	SNP_A-8502953	rs17045543	2	54241549	-	in gene
98	ACYP2	SNP_A-2278157	rs7574477	2	54241714	+	in gene
98	ACYP2	SNP_A-2128702	rs17045546	2	54244074	+	in gene
98	ACYP2	SNP_A-8690549	rs12621038	2	54244617	+	in gene
98	ACYP2	SNP_A-2201717	rs2090182	2	54245303	-	in gene
98	ACYP2	SNP_A-4261954	rs1215156	2	54246626	+	in gene
98	ACYP2	SNP_A-1963329	rs6744662	2	54247074	+	in gene
98	ACYP2	SNP_A-8677094	rs1001296	2	54253137	-	in gene
98	ACYP2	SNP_A-2266725	rs7594400	2	54257611	-	in gene
98	ACYP2	SNP_A-8332660	rs843676	2	54263605	-	in gene
98	ACYP2	SNP_A-2039295	rs1727522	2	54263682	+	in gene
98	ACYP2	SNP_A-2141499	rs843675	2	54264370	-	in gene
98	ACYP2	SNP_A-8570618	rs10211315	2	54265886	+	in gene
98	ACYP2	SNP_A-8312574	rs7585336	2	54271461	-	in gene
98	ACYP2	SNP_A-8699711	rs17045595	2	54277501	-	in gene
98	ACYP2	SNP_A-8309221	rs1385273	2	54278011	-	in gene
98	ACYP2	SNP_A-8521810	rs1399513	2	54278105	-	in gene
98	ACYP2	SNP_A-1946689	rs1727504	2	54281638	-	in gene
98	ACYP2	SNP_A-4256270	rs10171521	2	54282174	-	in gene
98	ACYP2	SNP_A-4222243	rs13394772	2	54287530	-	in gene
98	ACYP2	SNP_A-8574648	rs1215147	2	54288336	+	in gene
98	ACYP2	SNP_A-8574649	rs2010461	2	54293814	+	in gene
98	ACYP2	SNP_A-8574650	rs17045658	2	54298870	-	in gene
98	ACYP2	SNP_A-8574651	rs17045660	2	54298914	+	in gene
98	ACYP2	SNP_A-8441461	rs17045680	2	54300849	-	in gene
98	ACYP2	SNP_A-8529631	rs843754	2	54301412	+	in gene
98	ACYP2	SNP_A-8487180	rs843758	2	54303362	+	in gene
98	ACYP2	SNP_A-8455169	rs1727505	2	54312597	-	in gene
98	ACYP2	SNP_A-8558811	rs843653	2	54322787	-	in gene
98	ACYP2	SNP_A-2076712	rs843652	2	54323207	+	in gene
98	ACYP2	SNP_A-2047442	rs11125529	2	54329370	+	in gene
98	ACYP2	SNP_A-2254960	rs12615749	2	54329389	+	in gene
98	ACYP2	SNP_A-2269594	rs12615793	2	54329418	+	in gene
98	ACYP2	SNP_A-2114207	rs843711	2	54332621	+	in gene
98	ACYP2	SNP_A-8633913	rs11896604	2	54332703	-	in gene
98	ACYP2	SNP_A-8623422	rs843710	2	54333062	+	in gene
98	ACYP2	SNP_A-8457722	rs843709	2	54333150	-	in gene
98	ACYP2	SNP_A-1906118	rs843706	2	54333873	-	in gene
98	ACYP2	SNP_A-2064223	rs843705	2	54335096	+	in gene
98	ACYP2	SNP_A-8361266	rs17189743	2	54336057	+	in gene
98	ACYP2	SNP_A-8322409	rs13424808	2	54336446	+	in gene
98	ACYP2	SNP_A-8655661	rs843704	2	54336468	-	in gene
98	ACYP2	SNP_A-8716834	rs843697	2	54341318	-	in gene
98	ACYP2	SNP_A-8452713	rs843692	2	54342015	+	in gene
98	ACYP2	SNP_A-8362925	rs843691	2	54342168	+	in gene
98	ACYP2	SNP_A-2168834	rs843690	2	54342225	-	in gene
98	ACYP2	SNP_A-1963333	rs843685	2	54345299	-	in gene
98	ACYP2	SNP_A-1963334	rs843684	2	54345583	-	in gene
98	ACYP2	SNP_A-8292611	rs1817557	2	54347952	+	in gene
98	ACYP2	SNP_A-8554182	rs7579722	2	54348726	-	in gene
98	ACYP2	SNP_A-8399494	rs843748	2	54356416	-	in gene
98	ACYP2	SNP_A-8402659	rs17189820	2	54361524	-	in gene
98	ACYP2	SNP_A-8660530	rs6761289	2	54362235	+	in gene
98	ACYP2	SNP_A-8386399	rs10199945	2	54362579	-	in gene
98	ACYP2	SNP_A-2231468	rs843721	2	54364345	-	in gene
98	ACYP2	SNP_A-4248695	rs860056	2	54364730	-	in gene
98	ACYP2	SNP_A-2236073	rs843722	2	54365135	+	in gene
98	ACYP2	SNP_A-8574652	rs843726	2	54367246	-	in gene
98	ACYP2	SNP_A-8368020	rs13407966	2	54368042	-	in gene
98	ACYP2	SNP_A-8553061	rs843730	2	54371357	-	in gene
98	ACYP2	SNP_A-1946683	rs843731	2	54371460	+	in gene
98	ACYP2	SNP_A-4222047	rs843732	2	54373551	-	in gene
98	ACYP2	SNP_A-8631749	rs11690064	2	54374905	+	in gene
98	ACYP2	SNP_A-8482061	rs17045788	2	54375914	-	in gene
98	ACYP2	SNP_A-8349409	rs698756	2	54376789	+	in gene
98	ACYP2	SNP_A-8514587	rs17045792	2	54377154	-	in gene
98	ACYP2	SNP_A-2154237	rs41373348	2	54389208	-	3267
8540	AGPS	SNP_A-1802191	rs1349762	2	177964521	+	-1210
8540	AGPS	SNP_A-1871577	rs7594073	2	177964967	+	-764
8540	AGPS	SNP_A-2006862	rs4350784	2	177968720	-	in gene
8540	AGPS	SNP_A-1915330	rs4402804	2	177972645	-	in gene
8540	AGPS	SNP_A-8575281	rs2364849	2	177975748	+	in gene
8540	AGPS	SNP_A-8674477	rs16865203	2	177976525	-	in gene
8540	AGPS	SNP_A-4262405	rs10497509	2	177978641	-	in gene
8540	AGPS	SNP_A-8657994	rs4893823	2	177994057	+	in gene
8540	AGPS	SNP_A-1965988	rs9288001	2	177994795	+	in gene
8540	AGPS	SNP_A-4208515	rs10497507	2	177994952	-	in gene
8540	AGPS	SNP_A-2006863	rs4893825	2	178006933	-	in gene
8540	AGPS	SNP_A-2255840	rs2167902	2	178010658	-	in gene
8540	AGPS	SNP_A-2179073	rs7604299	2	178012168	-	in gene
8540	AGPS	SNP_A-4194919	rs10184488	2	178012227	+	in gene
8540	AGPS	SNP_A-8551970	rs2121430	2	178026621	-	in gene
8540	AGPS	SNP_A-8542205	rs3769998	2	178033721	+	in gene
8540	AGPS	SNP_A-8563140	rs1867904	2	178045958	-	in gene
8540	AGPS	SNP_A-8463010	rs7573086	2	178058400	-	in gene
8540	AGPS	SNP_A-8569313	rs12618139	2	178061628	-	in gene
8540	AGPS	SNP_A-8356189	rs1348848	2	178066479	-	in gene
8540	AGPS	SNP_A-8520437	rs12469386	2	178066527	-	in gene
8540	AGPS	SNP_A-4242586	rs17326999	2	178068321	-	in gene
8540	AGPS	SNP_A-4208516	rs10497503	2	178079985	+	in gene
8540	AGPS	SNP_A-8575282	rs6710575	2	178085557	-	in gene
8540	AGPS	SNP_A-1965989	rs6433672	2	178086421	-	in gene
8540	AGPS	SNP_A-1838546	rs7588049	2	178099024	+	in gene
8540	AGPS	SNP_A-2042063	rs16865334	2	178106725	-	in gene
8540	AGPS	SNP_A-2029799	rs13004955	2	178107169	+	in gene
8540	AGPS	SNP_A-1838358	rs4893829	2	178108056	-	in gene
8540	AGPS	SNP_A-2178792	rs10803912	2	178115422	+	3011
8540	AGPS	SNP_A-2255225	rs2293475	2	178116143	+	3732
189	AGXT	SNP_A-8330387	rs7606856	2	241452294	-	-4541
189	AGXT	SNP_A-4208752	rs4129624	2	241452751	-	-4084
189	AGXT	SNP_A-8554870	rs7340215	2	241454524	+	-2311
189	AGXT	SNP_A-8440433	rs13430507	2	241463363	+	in gene
189	AGXT	SNP_A-2033585	rs4675792	2	241468199	-	989
189	AGXT	SNP_A-1938696	rs4675874	2	241468469	+	1259
189	AGXT	SNP_A-2113412	rs4312490	2	241470154	-	2944
189	AGXT	SNP_A-8626374	rs7590032	2	241470838	-	3628
189	AGXT	SNP_A-2277087	rs6437372	2	241471079	-	3869
189	AGXT	SNP_A-2163549	rs6741220	2	241471105	-	3895
471	ATIC	SNP_A-2082240	rs7578850	2	215882941	-	-2140
471	ATIC	SNP_A-8445714	rs7578865	2	215882988	-	-2093
471	ATIC	SNP_A-8433291	rs11892429	2	215890073	+	in gene
471	ATIC	SNP_A-2100155	rs7585489	2	215890113	+	in gene
471	ATIC	SNP_A-2257768	rs41501252	2	215900412	-	in gene
471	ATIC	SNP_A-1831135	rs1880586	2	215903416	-	in gene
471	ATIC	SNP_A-8606742	rs1983462	2	215903526	-	in gene
471	ATIC	SNP_A-2100807	rs13005416	2	215904290	-	in gene
471	ATIC	SNP_A-8468633	rs13002576	2	215909152	-	in gene
471	ATIC	SNP_A-2204388	rs16853821	2	215911272	-	in gene
471	ATIC	SNP_A-8582060	rs16853823	2	215911541	-	in gene
471	ATIC	SNP_A-2248044	rs16853826	2	215913412	+	in gene
471	ATIC	SNP_A-4280790	rs1997059	2	215913717	-	in gene
471	ATIC	SNP_A-4294675	rs17514110	2	215913729	-	in gene
471	ATIC	SNP_A-2187778	rs4673990	2	215914298	-	in gene
471	ATIC	SNP_A-2135210	rs16853829	2	215914356	+	in gene
471	ATIC	SNP_A-8555566	rs6737407	2	215915366	-	in gene
471	ATIC	SNP_A-8358342	rs7586969	2	215915470	-	in gene
471	ATIC	SNP_A-8298360	rs2030774	2	215917037	-	in gene
471	ATIC	SNP_A-8301524	rs10204232	2	215923927	-	1203
471	ATIC	SNP_A-8459913	rs7604984	2	215925884	-	3160
518	ATP5G3	SNP_A-1914624	rs13006117	2	175745728	+	-3504
518	ATP5G3	SNP_A-2025199	rs185584	2	175749676	-	in gene
617	BCS1L	SNP_A-2007018	rs7600121	2	219228626	+	-3997
617	BCS1L	SNP_A-1851126	rs2303561	2	219235249	+	in gene
617	BCS1L	SNP_A-1915303	rs33946522	2	219235956	+	in gene
617	BCS1L	SNP_A-8476193	rs13023453	2	219239627	+	3217
79568	C2orf47	SNP_A-2161794	rs16832105	2	200530552	+	in gene
79568	C2orf47	SNP_A-2021253	rs17591211	2	200535899	+	in gene
79568	C2orf47	SNP_A-1848695	rs17591218	2	200536347	-	in gene
79568	C2orf47	SNP_A-4291035	rs16832107	2	200536528	-	in gene
79568	C2orf47	SNP_A-4290908	rs4263095	2	200538382	-	1297
55471	C2orf56	SNP_A-8421578	rs2714473	2	37312812	+	in gene
55471	C2orf56	SNP_A-1865388	rs2714474	2	37313239	-	in gene
55471	C2orf56	SNP_A-1860211	rs2372888	2	37313738	-	in gene
55471	C2orf56	SNP_A-8572186	rs1861444	2	37318015	-	in gene
55471	C2orf56	SNP_A-1923716	rs12712529	2	37328618	+	in gene
55471	C2orf56	SNP_A-8693542	rs10184179	2	37333260	-	3453
55471	C2orf56	SNP_A-1962767	rs1056021	2	37333753	+	3946
841	CASP8	SNP_A-2237318	rs12693932	2	201801640	+	-4771
841	CASP8	SNP_A-4222801	rs2037815	2	201809960	-	in gene
841	CASP8	SNP_A-2126767	rs3769827	2	201810930	+	in gene
841	CASP8	SNP_A-8478209	rs6745051	2	201816986	+	in gene
841	CASP8	SNP_A-8708556	rs6760993	2	201819162	-	in gene
841	CASP8	SNP_A-2208971	rs3769825	2	201819625	+	in gene
841	CASP8	SNP_A-8685250	rs6712381	2	201821797	-	in gene
841	CASP8	SNP_A-4252730	rs11899004	2	201822271	-	in gene
841	CASP8	SNP_A-1816565	rs16836965	2	201825755	-	in gene
841	CASP8	SNP_A-8624743	rs3754935	2	201827517	+	in gene
841	CASP8	SNP_A-4200929	rs13402616	2	201828012	+	in gene
841	CASP8	SNP_A-8333833	rs6754084	2	201833242	-	in gene
841	CASP8	SNP_A-2304603	rs1861269	2	201835183	+	in gene
841	CASP8	SNP_A-8604508	rs10084352	2	201835962	+	in gene
841	CASP8	SNP_A-4196910	rs6723097	2	201836863	+	in gene
841	CASP8	SNP_A-8576956	rs3754934	2	201840352	-	in gene
841	CASP8	SNP_A-8438352	rs700636	2	201861497	-	818
841	CASP8	SNP_A-8655223	rs11674814	2	201862091	+	1412
841	CASP8	SNP_A-2164978	rs6743068	2	201862165	+	1486
841	CASP8	SNP_A-2205788	rs17468277	2	201862445	-	1766
10574	CCT7	SNP_A-8454309	rs6727458	2	73312534	+	-2379
10574	CCT7	SNP_A-1963774	rs1474298	2	73320100	-	in gene
10574	CCT7	SNP_A-8576206	rs1018342	2	73325161	-	in gene
10574	CCT7	SNP_A-2279993	rs12465780	2	73325520	+	in gene
10574	CCT7	SNP_A-8388677	rs12104774	2	73325932	+	in gene
10574	CCT7	SNP_A-8692709	rs3820701	2	73326719	-	in gene
80219	COQ10B	SNP_A-8390873	rs16865976	2	198032056	-	in gene
1329	COX5B	SNP_A-8681365	rs17022096	2	97628897	+	-56
1329	COX5B	SNP_A-1936544	rs6542982	2	97635542	-	4453
9167	COX7A2L	SNP_A-4242395	rs2041354	2	42426179	-	-4967
9167	COX7A2L	SNP_A-1797301	rs12472029	2	42426590	-	-4556
9167	COX7A2L	SNP_A-8649688	rs10189710	2	42426606	-	-4540
9167	COX7A2L	SNP_A-1860469	rs3806584	2	42442360	-	500
9167	COX7A2L	SNP_A-8530402	rs3755304	2	42443425	-	1565
1373	CPS1	SNP_A-2030355	rs10172081	2	211126163	+	-3420
1373	CPS1	SNP_A-8326286	rs2287604	2	211134905	-	in gene
1373	CPS1	SNP_A-8582589	rs10932343	2	211135821	-	in gene
1373	CPS1	SNP_A-1843321	rs2370997	2	211138348	-	in gene
1373	CPS1	SNP_A-8524716	rs17773661	2	211138705	-	in gene
1373	CPS1	SNP_A-1966720	rs10515951	2	211139283	+	in gene
1373	CPS1	SNP_A-8679511	rs13399140	2	211139319	+	in gene
1373	CPS1	SNP_A-2146202	rs6714124	2	211144310	-	in gene
1373	CPS1	SNP_A-8577544	rs12694203	2	211145859	-	in gene
1373	CPS1	SNP_A-4277956	rs7573258	2	211146641	-	in gene
1373	CPS1	SNP_A-2006977	rs4640325	2	211156869	+	in gene
1373	CPS1	SNP_A-8577546	rs2371000	2	211174025	+	in gene
1373	CPS1	SNP_A-2295936	rs6734696	2	211177368	+	in gene
1373	CPS1	SNP_A-1865644	rs3821135	2	211194613	+	in gene
1373	CPS1	SNP_A-8446324	rs7607205	2	211197348	+	in gene
1373	CPS1	SNP_A-8421716	rs6750325	2	211209578	+	in gene
1373	CPS1	SNP_A-1941283	rs7572146	2	211209682	-	in gene
1373	CPS1	SNP_A-8551997	rs13429886	2	211214556	-	in gene
1373	CPS1	SNP_A-2118841	rs2371007	2	211216439	+	in gene
1373	CPS1	SNP_A-8495745	rs4356603	2	211216532	-	in gene
1373	CPS1	SNP_A-8630175	rs16844718	2	211216815	-	in gene
1373	CPS1	SNP_A-8447709	rs6724941	2	211217245	-	in gene
1373	CPS1	SNP_A-2130719	rs3213785	2	211220682	-	in gene
1373	CPS1	SNP_A-4208651	rs2371010	2	211221930	-	in gene
1373	CPS1	SNP_A-8577547	rs2371011	2	211222737	+	in gene
1373	CPS1	SNP_A-8553799	rs11681045	2	211225115	-	in gene
1373	CPS1	SNP_A-8693905	rs7599931	2	211225668	+	in gene
1373	CPS1	SNP_A-2276929	rs13010236	2	211229033	-	in gene
1373	CPS1	SNP_A-1893159	rs4233981	2	211237623	-	in gene
1373	CPS1	SNP_A-1803763	rs12997383	2	211238095	-	in gene
1373	CPS1	SNP_A-4273610	rs4142154	2	211244514	-	in gene
1373	CPS1	SNP_A-8544146	rs6748782	2	211249309	+	in gene
1373	CPS1	SNP_A-8649936	rs6749137	2	211249410	-	in gene
1373	CPS1	SNP_A-2096440	rs4142152	2	211254288	-	2212
1373	CPS1	SNP_A-1931060	rs4142151	2	211254358	+	2282
1593	CYP27A1	SNP_A-4282616	rs7603709	2	219350845	-	-4104
1593	CYP27A1	SNP_A-8365722	rs4674338	2	219355731	+	in gene
1593	CYP27A1	SNP_A-4269081	rs933994	2	219358860	+	in gene
1593	CYP27A1	SNP_A-1860843	rs1996992	2	219359593	-	in gene
1593	CYP27A1	SNP_A-2283001	rs6716642	2	219360063	-	in gene
1593	CYP27A1	SNP_A-2264555	rs17470271	2	219360239	-	in gene
1593	CYP27A1	SNP_A-8403193	rs1579401	2	219362771	-	in gene
1593	CYP27A1	SNP_A-1942478	rs4674343	2	219368590	-	in gene
1593	CYP27A1	SNP_A-8652172	rs7600248	2	219374207	-	in gene
1593	CYP27A1	SNP_A-2133708	rs6730792	2	219381806	-	in gene
1593	CYP27A1	SNP_A-2233578	rs691960	2	219382248	+	in gene
1593	CYP27A1	SNP_A-4197510	rs692258	2	219383489	-	in gene
1716	DGUOK	SNP_A-8705484	rs10186730	2	74007498	-	in gene
1716	DGUOK	SNP_A-4256680	rs2462124	2	74011099	-	in gene
1716	DGUOK	SNP_A-1900739	rs2694701	2	74020851	-	in gene
1716	DGUOK	SNP_A-8534936	rs831549	2	74025228	-	in gene
1716	DGUOK	SNP_A-8457785	rs831550	2	74025641	-	in gene
1716	DGUOK	SNP_A-8366297	rs7562212	2	74025979	-	in gene
1716	DGUOK	SNP_A-8605051	rs6546878	2	74028832	+	in gene
1716	DGUOK	SNP_A-8584155	rs4852322	2	74032897	-	in gene
1716	DGUOK	SNP_A-8359359	rs7558578	2	74034125	-	in gene
1716	DGUOK	SNP_A-4208164	rs4777	2	74039384	+	in gene
1716	DGUOK	SNP_A-4256406	rs7598248	2	74041101	-	1505
1716	DGUOK	SNP_A-8472883	rs6546882	2	74041211	+	1615
51277	DNAJC27	SNP_A-8468651	rs17046742	2	25019329	-	-680
51277	DNAJC27	SNP_A-1880445	rs955855	2	25025813	-	in gene
51277	DNAJC27	SNP_A-2279053	rs10432684	2	25035697	-	in gene
51277	DNAJC27	SNP_A-8480073	rs13388020	2	25049770	+	1442
51277	DNAJC27	SNP_A-2036163	rs6545841	2	25049994	-	1666
80303	EFHD1	SNP_A-8315966	rs7568461	2	233203236	+	-3332
80303	EFHD1	SNP_A-4283451	rs6752086	2	233213521	-	in gene
80303	EFHD1	SNP_A-4251459	rs4528745	2	233213766	+	in gene
80303	EFHD1	SNP_A-8713674	rs6741190	2	233214543	-	in gene
80303	EFHD1	SNP_A-2280808	rs10193825	2	233218866	-	in gene
80303	EFHD1	SNP_A-2291131	rs17362914	2	233219150	-	in gene
80303	EFHD1	SNP_A-2276054	rs17297115	2	233219223	-	in gene
80303	EFHD1	SNP_A-8500661	rs16829373	2	233222553	+	in gene
80303	EFHD1	SNP_A-8296115	rs16829377	2	233223991	+	in gene
80303	EFHD1	SNP_A-2281550	rs13395911	2	233228498	-	in gene
80303	EFHD1	SNP_A-8656592	rs12694911	2	233229186	-	in gene
80303	EFHD1	SNP_A-8367920	rs12694912	2	233236759	-	in gene
80303	EFHD1	SNP_A-1788671	rs12694913	2	233238144	-	in gene
80303	EFHD1	SNP_A-2063050	rs867838	2	233238814	+	in gene
80303	EFHD1	SNP_A-2167360	rs10933404	2	233239478	-	in gene
80303	EFHD1	SNP_A-2105672	rs10206127	2	233240811	+	in gene
80303	EFHD1	SNP_A-2143318	rs7578760	2	233241446	-	in gene
80303	EFHD1	SNP_A-2120070	rs11684420	2	233245170	-	in gene
80303	EFHD1	SNP_A-8596860	rs13009166	2	233245721	-	in gene
80303	EFHD1	SNP_A-2296792	rs17297626	2	233245958	+	in gene
80303	EFHD1	SNP_A-1829066	rs16829401	2	233246636	-	in gene
80303	EFHD1	SNP_A-8545357	rs6710612	2	233247255	-	in gene
80303	EFHD1	SNP_A-8460304	rs7578234	2	233251781	+	in gene
80303	EFHD1	SNP_A-8515840	rs7287	2	233255610	-	in gene
80303	EFHD1	SNP_A-8695936	rs2344567	2	233257056	-	1326
80303	EFHD1	SNP_A-8576820	rs2138401	2	233257264	-	1534
80303	EFHD1	SNP_A-2306918	rs7565128	2	233260488	+	4758
84908	FAM136A	SNP_A-8408891	rs4567961	2	70374379	-	-2234
84908	FAM136A	SNP_A-8702409	rs17615649	2	70375070	+	-1543
84908	FAM136A	SNP_A-1931044	rs1058256	2	70377476	-	in gene
84908	FAM136A	SNP_A-1786720	rs14234	2	70377646	+	in gene
22868	FASTKD2	SNP_A-1889593	rs16838832	2	207334951	+	-3666
22868	FASTKD2	SNP_A-8595299	rs11896121	2	207337607	+	-1010
22868	FASTKD2	SNP_A-1966611	rs16838842	2	207338605	+	-12
22868	FASTKD2	SNP_A-8590225	rs2287630	2	207341197	+	in gene
22868	FASTKD2	SNP_A-2278044	rs3815686	2	207341247	+	in gene
22868	FASTKD2	SNP_A-8390956	rs10177169	2	207345298	-	in gene
22868	FASTKD2	SNP_A-8512133	rs888621	2	207357595	+	in gene
22868	FASTKD2	SNP_A-2187702	rs2287629	2	207358659	+	in gene
22868	FASTKD2	SNP_A-2062228	rs879472	2	207360027	+	in gene
22868	FASTKD2	SNP_A-4234719	rs6435351	2	207367259	+	1784
285135	FSIP2	SNP_A-1894943	rs1544713	2	186314170	+	-4342
285135	FSIP2	SNP_A-4234804	rs1544710	2	186315740	-	-2772
285135	FSIP2	AFFX-SNP_8784013	rs1544710	2	186315740	-	-2772
285135	FSIP2	SNP_A-2156918	rs9646802	2	186316584	-	-1928
285135	FSIP2	SNP_A-8488422	rs12998684	2	186316768	+	-1744
285135	FSIP2	SNP_A-2068762	rs11893024	2	186318830	+	in gene
285135	FSIP2	SNP_A-8416139	rs13429390	2	186322307	+	in gene
285135	FSIP2	SNP_A-4202810	rs7592890	2	186326252	+	in gene
285135	FSIP2	SNP_A-2150914	rs10084180	2	186329034	-	in gene
285135	FSIP2	SNP_A-8597604	rs10180581	2	186333742	+	in gene
285135	FSIP2	SNP_A-2171649	rs4667053	2	186335261	-	in gene
285135	FSIP2	SNP_A-1888899	rs7607020	2	186335486	-	in gene
285135	FSIP2	SNP_A-2082817	rs17228483	2	186336448	-	in gene
2744	GLS	SNP_A-2153118	rs11687659	2	191449442	+	-4350
2744	GLS	SNP_A-4287378	rs3771316	2	191457280	+	in gene
2744	GLS	SNP_A-2084281	rs11691127	2	191467013	-	in gene
2744	GLS	SNP_A-1870798	rs16833031	2	191467790	+	in gene
2744	GLS	SNP_A-8577366	rs12998878	2	191479139	-	in gene
2744	GLS	SNP_A-8577367	rs16833042	2	191480951	-	in gene
2744	GLS	SNP_A-1966284	rs16833049	2	191484495	-	in gene
2744	GLS	SNP_A-2176501	rs4853529	2	191490705	-	in gene
2744	GLS	SNP_A-8658055	rs13000464	2	191495113	-	in gene
2744	GLS	SNP_A-1906803	rs6434429	2	191503791	+	in gene
2744	GLS	SNP_A-8547864	rs984610	2	191516954	-	in gene
2744	GLS	SNP_A-8321743	rs1607187	2	191523283	-	in gene
2744	GLS	SNP_A-8527542	rs1517354	2	191524111	-	in gene
2744	GLS	SNP_A-1953517	rs867637	2	191534627	-	in gene
2744	GLS	SNP_A-8523838	rs1546646	2	191536841	+	in gene
2744	GLS	SNP_A-8546730	rs10437	2	191536931	+	in gene
2744	GLS	SNP_A-8322305	rs3088307	2	191537657	+	in gene
2820	GPD2	SNP_A-4262326	rs298300	2	157008191	+	in gene
2820	GPD2	SNP_A-2220250	rs12104533	2	157013377	-	in gene
2820	GPD2	SNP_A-1921461	rs298233	2	157013500	-	in gene
2820	GPD2	SNP_A-4218387	rs298236	2	157015274	+	in gene
2820	GPD2	SNP_A-2120071	rs12694629	2	157020393	+	in gene
2820	GPD2	SNP_A-1881914	rs4664206	2	157023994	+	in gene
2820	GPD2	SNP_A-1801015	rs548516	2	157025710	-	in gene
2820	GPD2	SNP_A-1895270	rs4635480	2	157026061	-	in gene
2820	GPD2	SNP_A-8331982	rs298259	2	157033071	+	in gene
2820	GPD2	SNP_A-8660875	rs298265	2	157037930	+	in gene
2820	GPD2	SNP_A-2112351	rs298224	2	157050688	-	in gene
2820	GPD2	SNP_A-2120508	rs297581	2	157060664	-	in gene
2820	GPD2	SNP_A-2168528	rs13396538	2	157067772	-	in gene
2820	GPD2	SNP_A-4279653	rs297594	2	157072274	-	in gene
2820	GPD2	SNP_A-2306629	rs297598	2	157076499	-	in gene
2820	GPD2	SNP_A-8575467	rs690945	2	157079471	+	in gene
2820	GPD2	SNP_A-1860992	rs526540	2	157081858	+	in gene
2820	GPD2	SNP_A-8533317	rs297597	2	157086779	+	in gene
2820	GPD2	SNP_A-1844906	rs9288592	2	157092191	-	in gene
2820	GPD2	SNP_A-1783214	rs571785	2	157095965	-	in gene
2820	GPD2	SNP_A-2222278	rs542355	2	157096896	+	in gene
2820	GPD2	SNP_A-8493916	rs692187	2	157096948	+	in gene
2820	GPD2	SNP_A-1965505	rs2568816	2	157099822	-	in gene
2820	GPD2	SNP_A-1965506	rs1368249	2	157099980	+	in gene
2820	GPD2	SNP_A-4227633	rs3820857	2	157100870	+	in gene
2820	GPD2	SNP_A-8488659	rs3769357	2	157101520	-	in gene
2820	GPD2	SNP_A-1900587	rs1347098	2	157109074	+	in gene
2820	GPD2	SNP_A-8636285	rs3769364	2	157110100	-	in gene
2820	GPD2	SNP_A-1860355	rs17266406	2	157132783	+	in gene
2820	GPD2	SNP_A-8630982	rs17266469	2	157134218	-	in gene
2820	GPD2	SNP_A-1965507	rs41492145	2	157135429	-	in gene
2820	GPD2	SNP_A-1965508	rs2288760	2	157135568	+	in gene
2820	GPD2	SNP_A-8410871	rs7591462	2	157139667	+	in gene
2820	GPD2	SNP_A-2132664	rs9288604	2	157140001	+	in gene
2820	GPD2	SNP_A-2006800	rs2280278	2	157149910	+	in gene
2820	GPD2	SNP_A-8413598	rs3916984	2	157154086	+	2925
2820	GPD2	SNP_A-8575468	rs1432573	2	157155967	+	4806
3030	HADHA	SNP_A-2077590	rs17593512	2	26271333	+	in gene
3030	HADHA	SNP_A-8492129	rs13004974	2	26277888	-	in gene
3030	HADHA	SNP_A-2281009	rs4665318	2	26278021	+	in gene
3030	HADHA	SNP_A-8591996	rs4665319	2	26278087	+	in gene
3030	HADHA	SNP_A-1871805	rs17527979	2	26281636	-	in gene
3030	HADHA	SNP_A-2165810	rs6749046	2	26282955	-	in gene
3030	HADHA	SNP_A-8496935	rs10181995	2	26283132	+	in gene
3030	HADHA	SNP_A-1962485	rs2196153	2	26299649	-	in gene
3032	HADHB	SNP_A-8636379	rs6754697	2	26344865	-	in gene
3032	HADHB	SNP_A-8442711	rs6745226	2	26347101	+	in gene
3032	HADHB	SNP_A-8280502	rs1056389	2	26356379	+	in gene
26275	HIBCH	SNP_A-2135011	rs6753459	2	190772998	-	-4607
26275	HIBCH	SNP_A-8432914	rs7562807	2	190782169	+	in gene
26275	HIBCH	SNP_A-1876221	rs3791789	2	190793066	+	in gene
26275	HIBCH	SNP_A-2182219	rs3828269	2	190793355	+	in gene
26275	HIBCH	SNP_A-2187891	rs4853687	2	190793443	+	in gene
26275	HIBCH	SNP_A-4262439	rs2562796	2	190821254	+	in gene
26275	HIBCH	SNP_A-1966273	rs7590991	2	190821498	-	in gene
26275	HIBCH	SNP_A-4290552	rs713425	2	190824053	+	in gene
26275	HIBCH	SNP_A-2115908	rs1366676	2	190824211	-	in gene
26275	HIBCH	SNP_A-1966274	rs291406	2	190827307	+	in gene
26275	HIBCH	SNP_A-4262440	rs291407	2	190827544	-	in gene
26275	HIBCH	SNP_A-1966276	rs291408	2	190828865	+	in gene
26275	HIBCH	SNP_A-1801484	rs176712	2	190832527	+	in gene
26275	HIBCH	SNP_A-2070066	rs291418	2	190834491	+	in gene
26275	HIBCH	SNP_A-4274943	rs2582734	2	190851836	+	in gene
26275	HIBCH	SNP_A-1860812	rs4853689	2	190861259	+	in gene
26275	HIBCH	SNP_A-8471305	rs1595997	2	190874856	-	in gene
26275	HIBCH	SNP_A-1966278	rs2136569	2	190875659	+	in gene
26275	HIBCH	SNP_A-8577357	rs3791805	2	190881029	+	in gene
26275	HIBCH	SNP_A-1944662	rs291449	2	190885712	-	in gene
3099	HK2	SNP_A-2260310	rs657209	2	74909726	-	-3564
3099	HK2	SNP_A-2068706	rs670083	2	74910233	+	-3057
3099	HK2	SNP_A-1963804	rs608112	2	74912170	+	-1120
3099	HK2	SNP_A-2045246	rs619850	2	74912521	+	-769
3099	HK2	SNP_A-2097130	rs3821309	2	74926431	+	in gene
3099	HK2	SNP_A-2202304	rs1032206	2	74927090	+	in gene
3099	HK2	SNP_A-2133433	rs28362967	2	74927563	-	in gene
3099	HK2	SNP_A-1963805	rs10496195	2	74928440	-	in gene
3099	HK2	SNP_A-1963806	rs681900	2	74928475	-	in gene
3099	HK2	SNP_A-8576221	rs680545	2	74928763	-	in gene
3099	HK2	SNP_A-8432322	rs2123615	2	74934323	+	in gene
3099	HK2	SNP_A-1963807	rs6730141	2	74939075	-	in gene
3099	HK2	SNP_A-4255458	rs41498345	2	74941689	+	in gene
3099	HK2	SNP_A-4300297	rs3771773	2	74942962	-	in gene
3099	HK2	SNP_A-8586973	rs1545523	2	74943077	-	in gene
3099	HK2	SNP_A-2246219	rs1545522	2	74943197	+	in gene
3099	HK2	SNP_A-2049376	rs4853066	2	74943663	+	in gene
3099	HK2	SNP_A-2130510	rs3755452	2	74944273	-	in gene
3099	HK2	SNP_A-8471714	rs17010460	2	74946069	-	in gene
3099	HK2	SNP_A-8473671	rs13389855	2	74946282	-	in gene
3099	HK2	SNP_A-8309331	rs11688305	2	74946480	+	in gene
3099	HK2	SNP_A-8546921	rs3771771	2	74947521	-	in gene
3099	HK2	SNP_A-4221010	rs3771770	2	74947633	-	in gene
3099	HK2	SNP_A-2139741	rs3821307	2	74947766	+	in gene
3099	HK2	SNP_A-2185588	rs3771766	2	74949317	-	in gene
3099	HK2	SNP_A-4251545	rs6732614	2	74951691	+	in gene
3099	HK2	SNP_A-8297903	rs3732301	2	74952745	-	in gene
3099	HK2	SNP_A-2145942	rs3732300	2	74952889	+	in gene
3099	HK2	SNP_A-2130811	rs13384240	2	74953380	+	in gene
3099	HK2	SNP_A-8656477	rs1872837	2	74959949	+	in gene
3099	HK2	SNP_A-2202051	rs4241264	2	74960556	+	in gene
3099	HK2	SNP_A-2133538	rs17010492	2	74960709	-	in gene
3099	HK2	SNP_A-8311049	rs11903758	2	74960754	+	in gene
3099	HK2	SNP_A-8442348	rs2229626	2	74967165	+	in gene
3099	HK2	SNP_A-1843461	rs1565064	2	74968158	+	in gene
3099	HK2	SNP_A-1930562	rs923273	2	74968238	-	in gene
3099	HK2	SNP_A-1905854	rs2171385	2	74968347	+	in gene
3099	HK2	SNP_A-4233781	rs3821305	2	74972245	-	in gene
3099	HK2	SNP_A-8576222	rs10496196	2	74974033	-	44
3099	HK2	SNP_A-8576223	rs10496197	2	74974221	-	232
3099	HK2	SNP_A-2236068	rs10865404	2	74975153	+	1164
3099	HK2	SNP_A-8431676	rs4443024	2	74977545	+	3556
3099	HK2	SNP_A-2038206	rs4241265	2	74977807	-	3818
3329	HSPD1	SNP_A-2243425	rs788016	2	198060538	+	in gene
3329	HSPD1	SNP_A-4262458	rs8539	2	198070263	-	in gene
3329	HSPD1	SNP_A-2191543	rs6434930	2	198077615	-	4372
3336	HSPE1	SNP_A-4262458	rs8539	2	198070263	-	-3102
3336	HSPE1	SNP_A-2191543	rs6434930	2	198077615	-	1199
3336	HSPE1	SNP_A-2131714	rs13386066	2	198079932	-	3516
27429	HTRA2	SNP_A-2104355	rs17010022	2	74616766	+	2575
3417	IDH1	SNP_A-8455696	rs16840769	2	208807645	-	-1553
3417	IDH1	SNP_A-1899967	rs3769521	2	208824998	-	in gene
3417	IDH1	SNP_A-2146450	rs966730	2	208825543	+	in gene
3417	IDH1	SNP_A-8523646	rs1437410	2	208825562	+	in gene
3417	IDH1	SNP_A-8472759	rs12478635	2	208828503	-	452
3417	IDH1	SNP_A-8334138	rs7580715	2	208830504	+	2453
10989	IMMT	SNP_A-2307701	rs10179466	2	86228576	+	in gene
10989	IMMT	SNP_A-1920020	rs1124687	2	86230039	-	in gene
10989	IMMT	SNP_A-8532505	rs4569473	2	86231060	+	in gene
10989	IMMT	SNP_A-8564988	rs17618232	2	86234028	+	in gene
10989	IMMT	SNP_A-8364718	rs6547660	2	86236682	-	in gene
10989	IMMT	SNP_A-2266748	rs7561589	2	86238746	+	in gene
10989	IMMT	SNP_A-2076001	rs10191567	2	86238908	-	in gene
10989	IMMT	SNP_A-1820321	rs1057893	2	86239179	+	in gene
10989	IMMT	SNP_A-2296351	rs3770066	2	86245861	+	in gene
10989	IMMT	SNP_A-1964141	rs9917140	2	86246176	+	in gene
10989	IMMT	SNP_A-2312257	rs1424516	2	86248784	+	in gene
10989	IMMT	SNP_A-1843044	rs6729732	2	86248944	-	in gene
10989	IMMT	SNP_A-1956349	rs12477274	2	86252296	-	in gene
10989	IMMT	SNP_A-2299534	rs7609008	2	86253395	+	in gene
10989	IMMT	SNP_A-1964142	rs3821017	2	86257325	+	in gene
10989	IMMT	SNP_A-1916452	rs17027011	2	86260067	+	in gene
10989	IMMT	SNP_A-4262091	rs3770060	2	86260400	-	in gene
10989	IMMT	SNP_A-1964144	rs12469762	2	86264786	+	in gene
10989	IMMT	SNP_A-2094163	rs965636	2	86266961	+	in gene
10989	IMMT	SNP_A-1803444	rs10175330	2	86267625	-	in gene
10989	IMMT	SNP_A-2239941	rs12996308	2	86273443	-	in gene
10989	IMMT	SNP_A-1926677	rs17027021	2	86277359	+	955
10989	IMMT	SNP_A-8457390	rs6725046	2	86277760	-	1356
10989	IMMT	SNP_A-8355758	rs11900161	2	86280746	-	4342
8942	KYNU	SNP_A-8598039	rs2016775	2	143351316	-	-349
8942	KYNU	SNP_A-8483035	rs7586571	2	143354309	+	in gene
8942	KYNU	SNP_A-8537158	rs1439875	2	143355039	+	in gene
8942	KYNU	SNP_A-2296061	rs2278587	2	143355132	+	in gene
8942	KYNU	SNP_A-8409179	rs1438266	2	143363789	-	in gene
8942	KYNU	SNP_A-2157713	rs6429990	2	143365273	+	in gene
8942	KYNU	SNP_A-1818576	rs16858223	2	143367241	+	in gene
8942	KYNU	SNP_A-4273708	rs41349548	2	143367292	+	in gene
8942	KYNU	SNP_A-1877615	rs2043944	2	143368826	-	in gene
8942	KYNU	SNP_A-2076955	rs2099623	2	143381173	+	in gene
8942	KYNU	SNP_A-8499264	rs7564368	2	143381900	-	in gene
8942	KYNU	SNP_A-8375283	rs16858279	2	143383157	-	in gene
8942	KYNU	SNP_A-1965170	rs3768853	2	143391296	+	in gene
8942	KYNU	SNP_A-8576548	rs3768849	2	143401592	+	in gene
8942	KYNU	SNP_A-8460588	rs7557827	2	143404666	-	in gene
8942	KYNU	SNP_A-8407805	rs9917201	2	143415720	-	in gene
8942	KYNU	SNP_A-2302973	rs351688	2	143416594	+	in gene
8942	KYNU	SNP_A-2289518	rs351689	2	143417663	-	in gene
8942	KYNU	SNP_A-8613532	rs902924	2	143417725	+	in gene
8942	KYNU	SNP_A-8429386	rs6716717	2	143423138	-	in gene
8942	KYNU	SNP_A-4276218	rs12997823	2	143425561	+	in gene
8942	KYNU	SNP_A-2170294	rs351673	2	143430832	-	in gene
8942	KYNU	SNP_A-8384424	rs351671	2	143431124	-	in gene
8942	KYNU	SNP_A-8565522	rs2304705	2	143431735	+	in gene
8942	KYNU	SNP_A-4271371	rs351681	2	143431928	+	in gene
8942	KYNU	SNP_A-4222600	rs16858402	2	143433670	+	in gene
8942	KYNU	SNP_A-8332059	rs16858404	2	143434516	-	in gene
8942	KYNU	SNP_A-8390489	rs1866620	2	143435826	-	in gene
8942	KYNU	SNP_A-8605147	rs187090	2	143436242	+	in gene
8942	KYNU	SNP_A-2188974	rs16858410	2	143436421	+	in gene
8942	KYNU	SNP_A-8704115	rs351685	2	143436812	+	in gene
8942	KYNU	SNP_A-8522546	rs351683	2	143438474	+	in gene
8942	KYNU	SNP_A-4200247	rs16858418	2	143438794	-	in gene
8942	KYNU	SNP_A-2257200	rs7561260	2	143439309	+	in gene
8942	KYNU	SNP_A-1958408	rs16855215	2	143440751	-	in gene
8942	KYNU	SNP_A-1883331	rs11904225	2	143453671	+	in gene
8942	KYNU	SNP_A-2219656	rs16855227	2	143455646	+	in gene
8942	KYNU	SNP_A-8576549	rs4609990	2	143457640	-	in gene
8942	KYNU	SNP_A-1965173	rs10496933	2	143459002	-	in gene
8942	KYNU	SNP_A-8576550	rs12463750	2	143459716	+	in gene
8942	KYNU	SNP_A-8576551	rs16858449	2	143461535	+	in gene
8942	KYNU	SNP_A-8488312	rs10199416	2	143462845	-	in gene
8942	KYNU	SNP_A-8576552	rs1050950	2	143463319	+	in gene
8942	KYNU	SNP_A-8576553	rs1050951	2	143463434	+	in gene
8942	KYNU	SNP_A-4208376	rs1012875	2	143464093	+	in gene
8942	KYNU	SNP_A-8507144	rs11902056	2	143470198	+	in gene
8942	KYNU	SNP_A-8682278	rs34332680	2	143470215	+	in gene
8942	KYNU	SNP_A-1886192	rs2452477	2	143473225	-	in gene
8942	KYNU	SNP_A-4217585	rs352892	2	143474395	-	in gene
8942	KYNU	SNP_A-8576554	rs352890	2	143475927	+	in gene
8942	KYNU	SNP_A-1810047	rs352888	2	143476526	+	in gene
8942	KYNU	SNP_A-8550464	rs352930	2	143491981	-	in gene
8942	KYNU	SNP_A-8430527	rs7425446	2	143493968	+	in gene
8942	KYNU	SNP_A-4295241	rs6430001	2	143504218	+	in gene
8942	KYNU	SNP_A-2110102	rs16858537	2	143504359	-	in gene
8942	KYNU	SNP_A-2228810	rs7564245	2	143506839	+	in gene
8942	KYNU	SNP_A-2247922	rs2304700	2	143507484	+	in gene
8942	KYNU	SNP_A-4208377	rs3768844	2	143513164	+	in gene
8942	KYNU	SNP_A-1912994	rs3816193	2	143516377	-	22
51601	LIPT1	SNP_A-8685864	rs3791211	2	99145167	+	in gene
51601	LIPT1	SNP_A-1948139	rs2632277	2	99145417	-	in gene
51601	LIPT1	SNP_A-4208248	rs2309581	2	99150724	+	4681
51601	LIPT1	SNP_A-4208249	rs2309582	2	99150739	+	4696
10128	LRPPRC	SNP_A-8714374	rs7577294	2	43966156	+	-2235
10128	LRPPRC	SNP_A-8573509	rs10445885	2	43969604	+	in gene
10128	LRPPRC	SNP_A-4208047	rs2955280	2	43970340	+	in gene
10128	LRPPRC	SNP_A-4261891	rs12465555	2	43971693	+	in gene
10128	LRPPRC	SNP_A-4240136	rs6711308	2	43983444	-	in gene
10128	LRPPRC	SNP_A-1946829	rs4550712	2	43985595	+	in gene
10128	LRPPRC	SNP_A-8641100	rs13387221	2	43988818	+	in gene
10128	LRPPRC	SNP_A-8438242	rs6756365	2	43989501	+	in gene
10128	LRPPRC	SNP_A-8493408	rs17496334	2	43989841	-	in gene
10128	LRPPRC	SNP_A-2079862	rs17424442	2	43990011	+	in gene
10128	LRPPRC	SNP_A-1858575	rs17578429	2	43991525	+	in gene
10128	LRPPRC	SNP_A-2196554	rs7562014	2	43991991	+	in gene
10128	LRPPRC	SNP_A-1942472	rs4953037	2	44002946	+	in gene
10128	LRPPRC	SNP_A-1903875	rs41527246	2	44008014	+	in gene
10128	LRPPRC	SNP_A-8649204	rs13384238	2	44009490	-	in gene
10128	LRPPRC	SNP_A-8654793	rs9309112	2	44023393	-	in gene
10128	LRPPRC	SNP_A-2259247	rs4263155	2	44024085	+	in gene
10128	LRPPRC	SNP_A-8563850	rs4390811	2	44029729	-	in gene
10128	LRPPRC	SNP_A-4226709	rs41457846	2	44032969	+	in gene
10128	LRPPRC	SNP_A-2302869	rs11898901	2	44033240	+	in gene
10128	LRPPRC	SNP_A-1867683	rs17031775	2	44034009	-	in gene
10128	LRPPRC	SNP_A-2047868	rs17031777	2	44035602	+	in gene
10128	LRPPRC	SNP_A-2179652	rs41476150	2	44039740	-	in gene
10128	LRPPRC	SNP_A-8701338	rs6723119	2	44040708	+	in gene
10128	LRPPRC	SNP_A-1826552	rs10190161	2	44041333	+	in gene
10128	LRPPRC	SNP_A-1839440	rs17578702	2	44041410	+	in gene
10128	LRPPRC	SNP_A-8295397	rs10865195	2	44043111	-	in gene
10128	LRPPRC	SNP_A-1917665	rs6706695	2	44043684	-	in gene
10128	LRPPRC	SNP_A-8553950	rs4953041	2	44048004	-	in gene
10128	LRPPRC	SNP_A-8554078	rs13009461	2	44049250	+	in gene
10128	LRPPRC	SNP_A-8680100	rs13009669	2	44049313	+	in gene
10128	LRPPRC	SNP_A-8309300	rs11691326	2	44049699	+	in gene
10128	LRPPRC	SNP_A-8367094	rs4953042	2	44054880	-	in gene
10128	LRPPRC	SNP_A-1962968	rs6721144	2	44058051	+	in gene
10128	LRPPRC	SNP_A-1962969	rs6736282	2	44058221	-	in gene
10128	LRPPRC	SNP_A-8573510	rs6544723	2	44058502	-	in gene
10128	LRPPRC	SNP_A-2190655	rs17031803	2	44065512	+	in gene
10128	LRPPRC	SNP_A-8312281	rs9653492	2	44066126	-	in gene
10128	LRPPRC	SNP_A-8352092	rs12990017	2	44070883	+	in gene
10128	LRPPRC	SNP_A-1896435	rs12989909	2	44071048	+	in gene
10128	LRPPRC	SNP_A-1829238	rs12990439	2	44071092	-	in gene
10128	LRPPRC	SNP_A-2309249	rs4361173	2	44075905	+	in gene
254042	MAP1D	SNP_A-8333517	rs6433321	2	172568648	+	-4402
254042	MAP1D	SNP_A-1905826	rs7584187	2	172574351	+	in gene
254042	MAP1D	SNP_A-2265172	rs6433323	2	172581306	+	in gene
254042	MAP1D	SNP_A-8568019	rs6715929	2	172585753	-	in gene
254042	MAP1D	SNP_A-1932170	rs17428174	2	172594394	-	in gene
254042	MAP1D	SNP_A-4196013	rs16859959	2	172596973	+	in gene
254042	MAP1D	SNP_A-8680379	rs11681005	2	172597859	-	in gene
254042	MAP1D	SNP_A-2152947	rs17581610	2	172602726	+	in gene
254042	MAP1D	SNP_A-8607423	rs7606918	2	172603695	+	in gene
254042	MAP1D	SNP_A-2073609	rs12052246	2	172603852	-	in gene
254042	MAP1D	SNP_A-8527216	rs17500114	2	172604833	+	in gene
254042	MAP1D	SNP_A-4297545	rs788164	2	172621636	-	in gene
254042	MAP1D	SNP_A-1891765	rs788169	2	172626506	-	in gene
254042	MAP1D	SNP_A-2049575	rs788171	2	172630078	-	in gene
254042	MAP1D	SNP_A-8386794	rs12622144	2	172631698	-	in gene
254042	MAP1D	SNP_A-8575044	rs16859965	2	172652726	+	in gene
254042	MAP1D	SNP_A-8575045	rs788159	2	172652896	+	in gene
254042	MAP1D	SNP_A-2235490	rs788160	2	172654561	+	728
254042	MAP1D	SNP_A-4297126	rs1047889	2	172654773	-	940
92935	MARS2	SNP_A-2202173	rs10931791	2	198281857	+	498
92935	MARS2	SNP_A-8613220	rs4850808	2	198284387	+	3028
92935	MARS2	SNP_A-8588303	rs7584475	2	198285669	+	4310
84693	MCEE	SNP_A-8652553	rs13029989	2	71192054	-	in gene
84693	MCEE	SNP_A-8294152	rs9653504	2	71192093	-	in gene
84693	MCEE	SNP_A-8388095	rs17616692	2	71195278	-	in gene
84693	MCEE	SNP_A-8554962	rs17583054	2	71195650	-	in gene
84693	MCEE	SNP_A-8450971	rs6733097	2	71201267	+	in gene
84693	MCEE	SNP_A-8568026	rs10199088	2	71213652	+	2785
4190	MDH1	SNP_A-1920125	rs2028884	2	63665652	-	-3974
4190	MDH1	SNP_A-8527326	rs3754540	2	63666962	-	-2664
4190	MDH1	SNP_A-8628774	rs1109027	2	63668710	+	-916
4190	MDH1	SNP_A-8656839	rs17028056	2	63675167	+	in gene
4190	MDH1	SNP_A-8387839	rs10202649	2	63686468	-	in gene
4358	MPV17	SNP_A-4275470	rs4665965	2	27389884	+	in gene
4358	MPV17	SNP_A-8460812	rs1866568	2	27391684	+	in gene
9801	MRPL19	SNP_A-8681440	rs13026918	2	75728487	-	in gene
9801	MRPL19	SNP_A-8378365	rs13032535	2	75728825	+	in gene
9801	MRPL19	SNP_A-4300891	rs3771872	2	75731070	+	in gene
9801	MRPL19	SNP_A-8525853	rs1990145	2	75731158	+	in gene
9801	MRPL19	SNP_A-2275434	rs3771875	2	75731320	+	in gene
9801	MRPL19	SNP_A-8393650	rs6759555	2	75735336	+	in gene
9801	MRPL19	SNP_A-2109805	rs17689863	2	75735907	+	in gene
9801	MRPL19	SNP_A-2302548	rs1049678	2	75736164	+	in gene
9801	MRPL19	SNP_A-2054658	rs3732304	2	75736363	+	in gene
9801	MRPL19	SNP_A-8456552	rs10165899	2	75736784	+	in gene
9801	MRPL19	SNP_A-4229668	rs17690224	2	75745619	-	2777
9801	MRPL19	SNP_A-1963835	rs3213670	2	75746345	+	3503
51263	MRPL30	SNP_A-1964217	rs8179690	2	99161732	+	-2278
51263	MRPL30	SNP_A-2100626	rs11689265	2	99165699	+	in gene
51263	MRPL30	SNP_A-8575604	rs17022330	2	99169094	+	in gene
51263	MRPL30	SNP_A-8603139	rs10865030	2	99171074	-	in gene
51263	MRPL30	SNP_A-8441170	rs12053372	2	99176487	+	in gene
9553	MRPL33	SNP_A-1962498	rs3736594	2	27849285	+	in gene
9553	MRPL33	SNP_A-4207957	rs3792252	2	27849435	+	in gene
9553	MRPL33	AFFX-SNP_1315965	rs3792252	2	27849435	+	in gene
9553	MRPL33	SNP_A-4295883	rs17006242	2	27854555	+	in gene
9553	MRPL33	SNP_A-8560784	rs13030345	2	27856678	-	566
51318	MRPL35	SNP_A-1926677	rs17027021	2	86277359	+	-2732
51318	MRPL35	SNP_A-8457390	rs6725046	2	86277760	-	-2331
51318	MRPL35	SNP_A-8355758	rs11900161	2	86280746	-	in gene
51318	MRPL35	SNP_A-1814908	rs6547665	2	86285132	-	in gene
51318	MRPL35	SNP_A-8445154	rs7563209	2	86285250	+	in gene
51318	MRPL35	SNP_A-4233174	rs12714177	2	86287102	+	in gene
51318	MRPL35	SNP_A-8557834	rs3770059	2	86289578	-	in gene
51318	MRPL35	SNP_A-1877564	rs1540391	2	86290025	-	in gene
51318	MRPL35	SNP_A-8621648	rs17438451	2	86292111	-	in gene
51318	MRPL35	SNP_A-8461050	rs17027032	2	86292581	+	in gene
51318	MRPL35	SNP_A-1964145	rs3731817	2	86296059	-	2578
51318	MRPL35	SNP_A-1964146	rs12328643	2	86296416	-	2935
51318	MRPL35	SNP_A-1954718	rs3731815	2	86298029	-	4548
51318	MRPL35	SNP_A-1928953	rs12329034	2	86298076	+	4595
65080	MRPL44	SNP_A-8680518	rs13022402	2	224532246	+	in gene
65080	MRPL44	SNP_A-8399164	rs11546406	2	224532728	+	in gene
65080	MRPL44	SNP_A-8515201	rs6719605	2	224534023	+	in gene
65080	MRPL44	SNP_A-8518873	rs13001719	2	224536542	-	in gene
65080	MRPL44	SNP_A-1784968	rs1025734	2	224543613	-	2945
65080	MRPL44	SNP_A-2275841	rs16865368	2	224544831	+	4163
65080	MRPL44	SNP_A-2276291	rs16865371	2	224545511	-	4843
64965	MRPS9	SNP_A-8633786	rs11895517	2	105018754	+	-2184
64965	MRPS9	SNP_A-8545094	rs13406272	2	105023064	-	in gene
64965	MRPS9	SNP_A-8679810	rs17635199	2	105045818	-	in gene
64965	MRPS9	SNP_A-2260422	rs13399851	2	105045907	+	in gene
64965	MRPS9	SNP_A-1898930	rs4511739	2	105060356	-	in gene
64965	MRPS9	SNP_A-1909249	rs4851731	2	105060451	-	in gene
64965	MRPS9	SNP_A-8454927	rs3924668	2	105065470	-	in gene
64965	MRPS9	SNP_A-8636570	rs12617795	2	105078336	-	in gene
64965	MRPS9	SNP_A-8631573	rs12616421	2	105081619	-	in gene
10797	MTHFD2	SNP_A-8460933	rs7340453	2	74281523	+	in gene
10797	MTHFD2	SNP_A-8694827	rs1667627	2	74282700	-	in gene
10797	MTHFD2	SNP_A-4248617	rs17009735	2	74283048	+	in gene
10797	MTHFD2	SNP_A-2247341	rs10199560	2	74296559	+	626
10797	MTHFD2	SNP_A-1794195	rs702462	2	74297939	+	2006
10797	MTHFD2	SNP_A-8654415	rs844167	2	74299520	-	3587
4528	MTIF2	SNP_A-2006395	rs6545480	2	55314255	-	-3005
4528	MTIF2	SNP_A-8574665	rs2589083	2	55324911	+	in gene
4528	MTIF2	SNP_A-8431376	rs17046787	2	55329418	-	in gene
4528	MTIF2	SNP_A-2046718	rs2576709	2	55330095	-	in gene
4528	MTIF2	SNP_A-8561719	rs2576711	2	55330441	+	in gene
4528	MTIF2	SNP_A-1843908	rs2043712	2	55333526	-	in gene
4528	MTIF2	SNP_A-2055655	rs2589098	2	55338896	+	in gene
4528	MTIF2	SNP_A-8639405	rs3791628	2	55344292	+	in gene
4528	MTIF2	SNP_A-8380813	rs2589092	2	55344834	+	in gene
4528	MTIF2	SNP_A-8521953	rs7602357	2	55346194	+	in gene
4528	MTIF2	SNP_A-8641877	rs7590143	2	55348408	-	in gene
10651	MTX2	SNP_A-4205568	rs41475454	2	176837653	+	-4730
10651	MTX2	SNP_A-2039923	rs7558794	2	176838239	+	-4144
10651	MTX2	SNP_A-8468592	rs13413947	2	176853685	+	in gene
10651	MTX2	SNP_A-8705241	rs6709357	2	176854521	+	in gene
10651	MTX2	SNP_A-8382700	rs12471855	2	176864640	+	in gene
10651	MTX2	SNP_A-1965944	rs16863670	2	176865629	-	in gene
10651	MTX2	SNP_A-8401629	rs7576210	2	176867728	-	in gene
10651	MTX2	SNP_A-8499521	rs17806377	2	176869060	+	in gene
10651	MTX2	SNP_A-8636468	rs7597047	2	176871324	-	in gene
10651	MTX2	SNP_A-4243384	rs7571183	2	176871680	-	in gene
10651	MTX2	SNP_A-8680230	rs1880224	2	176872560	+	in gene
10651	MTX2	SNP_A-8333527	rs6748172	2	176878164	+	in gene
10651	MTX2	SNP_A-4256842	rs6712866	2	176885163	+	in gene
10651	MTX2	SNP_A-1940931	rs10803896	2	176885209	+	in gene
10651	MTX2	SNP_A-2140513	rs10930726	2	176894922	-	in gene
10651	MTX2	SNP_A-8563628	rs4464319	2	176895829	+	in gene
10651	MTX2	SNP_A-8312592	rs818356	2	176914082	+	3083
4705	NDUFA10	SNP_A-8301473	rs7573892	2	240545758	-	-3071
4705	NDUFA10	SNP_A-1850409	rs10933622	2	240548577	-	-252
4705	NDUFA10	SNP_A-8451949	rs13424612	2	240548794	+	-35
4705	NDUFA10	SNP_A-8685725	rs4077387	2	240549364	-	in gene
4705	NDUFA10	SNP_A-8347388	rs4296456	2	240555659	+	in gene
4705	NDUFA10	SNP_A-4299101	rs4854067	2	240555969	-	in gene
4705	NDUFA10	SNP_A-8701423	rs4560144	2	240556386	+	in gene
4705	NDUFA10	SNP_A-8660683	rs11887340	2	240556657	+	in gene
4705	NDUFA10	SNP_A-1885077	rs4149558	2	240561385	+	in gene
4705	NDUFA10	SNP_A-8576986	rs967477	2	240568873	-	in gene
4705	NDUFA10	SNP_A-2007164	rs4149551	2	240570136	+	in gene
4705	NDUFA10	SNP_A-8712267	rs4149549	2	240579939	-	in gene
4705	NDUFA10	SNP_A-8335009	rs4149548	2	240581914	+	in gene
4705	NDUFA10	SNP_A-1861590	rs12328143	2	240584130	-	in gene
4705	NDUFA10	SNP_A-4195754	rs6755847	2	240586619	-	in gene
4705	NDUFA10	SNP_A-8492740	rs10172804	2	240587152	+	in gene
4705	NDUFA10	SNP_A-2301866	rs11685586	2	240587208	+	in gene
4705	NDUFA10	SNP_A-8585016	rs10193610	2	240589291	+	in gene
4705	NDUFA10	SNP_A-4208753	rs2369088	2	240590037	-	in gene
4705	NDUFA10	SNP_A-8643673	rs4149544	2	240591835	-	in gene
4705	NDUFA10	SNP_A-8711305	rs6437230	2	240592381	+	in gene
4705	NDUFA10	SNP_A-2062777	rs1138444	2	240595439	-	in gene
4705	NDUFA10	SNP_A-8583916	rs3792087	2	240596737	+	in gene
4705	NDUFA10	SNP_A-1829287	rs3792085	2	240597462	+	in gene
4705	NDUFA10	SNP_A-4201022	rs3792083	2	240603577	-	in gene
4705	NDUFA10	SNP_A-4201727	rs3792082	2	240603589	-	in gene
4705	NDUFA10	SNP_A-1858810	rs6735806	2	240603645	+	in gene
4705	NDUFA10	SNP_A-1790736	rs4149542	2	240604553	-	in gene
4705	NDUFA10	SNP_A-8625273	rs6719018	2	240616589	-	3118
4709	NDUFB3	SNP_A-4250826	rs16842071	2	201639975	-	-4804
4709	NDUFB3	SNP_A-2250292	rs16836596	2	201640169	-	-4610
4709	NDUFB3	SNP_A-4262472	rs16836607	2	201641366	+	-3413
4709	NDUFB3	SNP_A-2225321	rs41514947	2	201645632	-	in gene
4719	NDUFS1	SNP_A-1966596	rs7590432	2	206693972	-	-2076
4719	NDUFS1	SNP_A-2301055	rs4675588	2	206694170	+	-1878
4719	NDUFS1	SNP_A-4196316	rs10198830	2	206696898	-	in gene
4719	NDUFS1	SNP_A-2203352	rs4147727	2	206699229	+	in gene
4719	NDUFS1	SNP_A-4275223	rs6435324	2	206702094	+	in gene
4719	NDUFS1	SNP_A-1953697	rs41488645	2	206710942	+	in gene
4719	NDUFS1	SNP_A-8332586	rs11886004	2	206718249	-	in gene
4719	NDUFS1	SNP_A-2074248	rs10169038	2	206723113	-	in gene
4719	NDUFS1	SNP_A-1966597	rs4147713	2	206724017	-	in gene
4719	NDUFS1	SNP_A-2113105	rs11689362	2	206733689	+	1257
4719	NDUFS1	SNP_A-2188687	rs2058705	2	206736564	-	4132
4719	NDUFS1	SNP_A-8562195	rs6730581	2	206737092	+	4660
27247	NFU1	SNP_A-4220441	rs10170036	2	69476640	+	-116
27247	NFU1	SNP_A-2256286	rs7580642	2	69479142	+	in gene
27247	NFU1	SNP_A-8534346	rs7559850	2	69502024	+	in gene
27247	NFU1	SNP_A-1839441	rs4581940	2	69509294	-	in gene
27247	NFU1	SNP_A-2222334	rs13416004	2	69518480	-	223
27247	NFU1	SNP_A-1819738	rs13418928	2	69518720	-	463
27247	NFU1	SNP_A-2027683	rs6714046	2	69521281	+	3024
60491	NIF3L1	SNP_A-2246809	rs13384245	2	201469182	-	in gene
60491	NIF3L1	SNP_A-2168433	rs10204787	2	201470392	-	in gene
60491	NIF3L1	SNP_A-2163622	rs16835473	2	201471728	-	in gene
64172	OSGEPL1	SNP_A-2128811	rs2254167	2	190319704	+	in gene
64172	OSGEPL1	SNP_A-2250390	rs1046196	2	190319753	+	in gene
64172	OSGEPL1	SNP_A-4252786	rs1898559	2	190320553	+	in gene
64172	OSGEPL1	SNP_A-8390325	rs1898560	2	190320572	+	in gene
64172	OSGEPL1	SNP_A-1914765	rs4666783	2	190321225	+	in gene
64172	OSGEPL1	SNP_A-2027096	rs2196670	2	190325206	+	in gene
64172	OSGEPL1	SNP_A-2006907	rs930426	2	190337285	-	1116
5163	PDK1	SNP_A-8462906	rs13412840	2	173124762	+	-4263
5163	PDK1	SNP_A-8293844	rs10202550	2	173127236	+	-1789
5163	PDK1	SNP_A-2034619	rs6752257	2	173133501	+	in gene
5163	PDK1	SNP_A-8368916	rs10930562	2	173138953	+	in gene
5163	PDK1	SNP_A-4304140	rs1869922	2	173154512	+	in gene
5163	PDK1	SNP_A-8693873	rs11686903	2	173154532	-	in gene
5163	PDK1	SNP_A-2091521	rs13385403	2	173157147	-	in gene
5163	PDK1	SNP_A-2084555	rs6723872	2	173161264	-	in gene
5163	PDK1	SNP_A-1943832	rs10201129	2	173161983	+	in gene
5163	PDK1	SNP_A-2299860	rs1075638	2	173173442	-	1334
25953	PNKD	SNP_A-1895841	rs4674282	2	218852474	+	in gene
25953	PNKD	SNP_A-1812956	rs992157	2	218863025	+	in gene
25953	PNKD	SNP_A-2174688	rs1017697	2	218878706	-	in gene
25953	PNKD	SNP_A-2281246	rs1017698	2	218878769	+	in gene
25953	PNKD	SNP_A-1895852	rs2014615	2	218879435	-	in gene
25953	PNKD	SNP_A-8638533	rs921969	2	218880057	+	in gene
25953	PNKD	SNP_A-2113750	rs7570012	2	218889594	+	in gene
25953	PNKD	SNP_A-2172498	rs10932773	2	218890141	-	in gene
25953	PNKD	SNP_A-8391414	rs4672886	2	218893789	-	in gene
25953	PNKD	SNP_A-1890408	rs10932774	2	218899813	+	in gene
25953	PNKD	SNP_A-8417627	rs9076	2	218919025	-	in gene
87178	PNPT1	SNP_A-8712022	rs10469932	2	55712983	+	-2973
87178	PNPT1	SNP_A-2027318	rs6739788	2	55715859	+	-97
87178	PNPT1	SNP_A-8353862	rs17047136	2	55724429	+	in gene
87178	PNPT1	SNP_A-1963362	rs7594497	2	55726042	-	in gene
87178	PNPT1	SNP_A-2204333	rs10460508	2	55736069	+	in gene
87178	PNPT1	SNP_A-1951570	rs6545513	2	55738368	-	in gene
87178	PNPT1	SNP_A-8381742	rs12993839	2	55748809	-	in gene
87178	PNPT1	SNP_A-1805268	rs782636	2	55748825	-	in gene
87178	PNPT1	SNP_A-4257702	rs782629	2	55753787	-	in gene
87178	PNPT1	SNP_A-4274599	rs782628	2	55754442	-	in gene
87178	PNPT1	SNP_A-1963363	rs1822513	2	55756520	+	in gene
87178	PNPT1	SNP_A-1963364	rs706551	2	55757124	-	in gene
87178	PNPT1	SNP_A-2283226	rs782620	2	55760967	+	in gene
87178	PNPT1	SNP_A-2296202	rs1443746	2	55771693	+	in gene
87178	PNPT1	SNP_A-1830743	rs782584	2	55774620	-	157
55037	PTCD3	SNP_A-1933101	rs2303340	2	86186704	-	-145
55037	PTCD3	SNP_A-8515810	rs11127016	2	86190615	-	in gene
55037	PTCD3	SNP_A-2242594	rs1075622	2	86191441	+	in gene
55037	PTCD3	SNP_A-2054596	rs17026940	2	86196300	+	in gene
55037	PTCD3	SNP_A-4290303	rs17618119	2	86196827	+	in gene
55037	PTCD3	SNP_A-2294362	rs2303339	2	86199691	+	in gene
55037	PTCD3	SNP_A-1831695	rs1019592	2	86208215	-	in gene
55037	PTCD3	SNP_A-2292287	rs2241437	2	86214084	-	in gene
55037	PTCD3	SNP_A-1881742	rs2241436	2	86214320	-	in gene
55037	PTCD3	SNP_A-8494155	rs2241435	2	86214427	+	in gene
55037	PTCD3	SNP_A-2108484	rs11395	2	86219118	-	in gene
26056	RAB11FIP5	SNP_A-4268999	rs6709269	2	73163100	-	in gene
26056	RAB11FIP5	SNP_A-2309511	rs17348624	2	73165577	+	in gene
26056	RAB11FIP5	SNP_A-2079583	rs17348638	2	73166080	-	in gene
26056	RAB11FIP5	SNP_A-2116367	rs6736153	2	73174856	-	in gene
26056	RAB11FIP5	SNP_A-1955048	rs7559074	2	73184022	-	in gene
57665	RDH14	SNP_A-8518579	rs6705223	2	18596503	+	-2970
57665	RDH14	SNP_A-8554089	rs2346135	2	18601269	-	in gene
57665	RDH14	SNP_A-2006178	rs7604190	2	18607563	-	2182
57665	RDH14	SNP_A-8572551	rs3747660	2	18608239	-	2858
246243	RNASEH1	SNP_A-8404804	rs13002108	2	3573709	+	in gene
246243	RNASEH1	SNP_A-2140399	rs4583476	2	3586631	-	2816
94097	SFXN5	SNP_A-8572362	rs17008501	2	73023117	-	in gene
94097	SFXN5	SNP_A-1894681	rs755409	2	73024238	+	in gene
94097	SFXN5	SNP_A-8610659	rs10195678	2	73024271	+	in gene
94097	SFXN5	SNP_A-8697879	rs11884345	2	73038487	+	in gene
94097	SFXN5	SNP_A-2069962	rs6710911	2	73063302	+	in gene
94097	SFXN5	SNP_A-8680010	rs17570040	2	73069663	-	in gene
94097	SFXN5	SNP_A-8453475	rs6759733	2	73069977	+	in gene
94097	SFXN5	SNP_A-2194404	rs11887106	2	73070151	+	in gene
94097	SFXN5	SNP_A-4260269	rs893258	2	73073430	-	in gene
94097	SFXN5	SNP_A-8460361	rs10191232	2	73080694	+	in gene
94097	SFXN5	SNP_A-8463512	rs7580216	2	73082507	-	in gene
94097	SFXN5	SNP_A-8296190	rs11900251	2	73083930	+	in gene
94097	SFXN5	SNP_A-8645872	rs17008584	2	73086317	-	in gene
94097	SFXN5	SNP_A-4262028	rs10197305	2	73088186	+	in gene
94097	SFXN5	SNP_A-4208163	rs6711891	2	73090177	-	in gene
94097	SFXN5	SNP_A-2274278	rs6546797	2	73101638	+	in gene
94097	SFXN5	SNP_A-2122485	rs17008611	2	73115358	-	in gene
94097	SFXN5	SNP_A-8661718	rs11893039	2	73133924	+	in gene
94097	SFXN5	SNP_A-8467583	rs10180720	2	73139260	-	in gene
94097	SFXN5	SNP_A-8394029	rs7566904	2	73139722	+	in gene
94097	SFXN5	SNP_A-1918535	rs13400948	2	73143395	+	in gene
8604	SLC25A12	SNP_A-8575043	rs17499544	2	172348980	-	-146
8604	SLC25A12	SNP_A-1965838	rs12692973	2	172350303	-	in gene
8604	SLC25A12	SNP_A-1965839	rs3770459	2	172356838	+	in gene
8604	SLC25A12	SNP_A-4219041	rs6433313	2	172365942	-	in gene
8604	SLC25A12	SNP_A-4229346	rs1022358	2	172366642	+	in gene
8604	SLC25A12	SNP_A-4197203	rs17581284	2	172367622	+	in gene
8604	SLC25A12	AFFX-SNP_10888208	rs17581284	2	172367622	+	in gene
8604	SLC25A12	SNP_A-8635946	rs6754817	2	172371640	+	in gene
8604	SLC25A12	SNP_A-8590734	rs10803864	2	172372694	+	in gene
8604	SLC25A12	SNP_A-4197338	rs3770455	2	172376141	-	in gene
8604	SLC25A12	SNP_A-2214808	rs3770452	2	172376928	+	in gene
8604	SLC25A12	SNP_A-8306761	rs3770450	2	172378799	+	in gene
8604	SLC25A12	SNP_A-8616153	rs6716901	2	172381699	-	in gene
8604	SLC25A12	SNP_A-8433342	rs3821094	2	172392360	+	in gene
8604	SLC25A12	SNP_A-8713475	rs12692976	2	172392649	-	in gene
8604	SLC25A12	SNP_A-4250691	rs6433315	2	172394536	-	in gene
8604	SLC25A12	SNP_A-8626795	rs12622895	2	172394550	+	in gene
8604	SLC25A12	SNP_A-4208495	rs2357206	2	172418850	-	in gene
8604	SLC25A12	SNP_A-1865562	rs10196521	2	172426491	-	in gene
8604	SLC25A12	SNP_A-1939425	rs1878583	2	172433547	-	in gene
55676	SLC30A6	SNP_A-2023080	rs4952209	2	32239537	+	-4900
55676	SLC30A6	SNP_A-2216946	rs6716179	2	32246580	-	in gene
55676	SLC30A6	SNP_A-8459575	rs13427170	2	32251614	-	in gene
55676	SLC30A6	SNP_A-1890803	rs7580118	2	32251638	-	in gene
55676	SLC30A6	SNP_A-8401182	rs418486	2	32258248	+	in gene
55676	SLC30A6	SNP_A-2186453	rs17011863	2	32261178	-	in gene
55676	SLC30A6	SNP_A-8316328	rs212758	2	32279486	-	in gene
55676	SLC30A6	SNP_A-2055976	rs177083	2	32301222	+	909
55676	SLC30A6	SNP_A-2295665	rs430759	2	32301372	-	1059
55676	SLC30A6	SNP_A-4228129	rs212706	2	32304636	-	4323
55676	SLC30A6	SNP_A-1957578	rs212708	2	32304950	+	4637
6697	SPR	SNP_A-8344744	rs1150500	2	72974951	-	2157
8802	SUCLG1	SNP_A-2150137	rs2832	2	84504218	-	in gene
8802	SUCLG1	SNP_A-4297990	rs4831970	2	84509731	-	in gene
8802	SUCLG1	SNP_A-1926721	rs4831973	2	84510955	-	in gene
8802	SUCLG1	SNP_A-2299710	rs17025020	2	84513004	-	in gene
8802	SUCLG1	SNP_A-8376430	rs12618709	2	84515868	-	in gene
8802	SUCLG1	SNP_A-4298980	rs17757829	2	84520145	+	in gene
8802	SUCLG1	SNP_A-4226788	rs1599306	2	84525993	-	in gene
8802	SUCLG1	SNP_A-8565365	rs6719880	2	84526866	-	in gene
8802	SUCLG1	SNP_A-8659794	rs7607535	2	84534897	-	in gene
8802	SUCLG1	SNP_A-1964104	rs1159790	2	84539400	-	in gene
80146	UXS1	SNP_A-1848194	rs7573766	2	106072149	+	-4042
80146	UXS1	SNP_A-4292390	rs7576737	2	106072417	-	-3774
80146	UXS1	SNP_A-2216798	rs6742284	2	106073331	-	-2860
80146	UXS1	SNP_A-8301435	rs3820893	2	106074409	+	-1782
80146	UXS1	SNP_A-1941299	rs6749640	2	106074754	+	-1437
80146	UXS1	SNP_A-1833258	rs2377451	2	106075279	+	-912
80146	UXS1	SNP_A-4247219	rs2377452	2	106075341	+	-850
80146	UXS1	SNP_A-4257805	rs2377453	2	106075356	-	-835
80146	UXS1	SNP_A-2240633	rs10206195	2	106080470	-	in gene
80146	UXS1	SNP_A-2237475	rs1901458	2	106082961	-	in gene
80146	UXS1	SNP_A-8394370	rs4851919	2	106086038	-	in gene
80146	UXS1	SNP_A-2102172	rs4851920	2	106086194	-	in gene
80146	UXS1	SNP_A-8434423	rs725216	2	106088377	-	in gene
80146	UXS1	SNP_A-2006588	rs1901470	2	106088682	-	in gene
80146	UXS1	SNP_A-2073454	rs17032398	2	106089385	+	in gene
80146	UXS1	SNP_A-1964364	rs2377454	2	106093560	+	in gene
80146	UXS1	SNP_A-1964365	rs41320344	2	106093796	-	in gene
80146	UXS1	SNP_A-8379824	rs6543374	2	106096424	+	in gene
80146	UXS1	SNP_A-1871753	rs6543375	2	106096579	+	in gene
80146	UXS1	SNP_A-8644246	rs12996345	2	106097008	+	in gene
80146	UXS1	SNP_A-1831919	rs6752351	2	106097365	+	in gene
80146	UXS1	SNP_A-4249195	rs737101	2	106098977	+	in gene
80146	UXS1	SNP_A-4219313	rs2167531	2	106105057	-	in gene
80146	UXS1	SNP_A-2156481	rs10185531	2	106105267	-	in gene
80146	UXS1	SNP_A-8464268	rs3739137	2	106108609	+	in gene
80146	UXS1	SNP_A-8332924	rs3739138	2	106108788	-	in gene
80146	UXS1	SNP_A-8707101	rs11680226	2	106111476	-	in gene
80146	UXS1	SNP_A-4208279	rs3806506	2	106122129	+	in gene
80146	UXS1	SNP_A-2284976	rs17279736	2	106123797	+	in gene
80146	UXS1	SNP_A-2039440	rs17032493	2	106124004	+	in gene
80146	UXS1	SNP_A-8451230	rs10189907	2	106127603	-	in gene
80146	UXS1	SNP_A-8581473	rs2028566	2	106128798	+	in gene
80146	UXS1	SNP_A-1912106	rs6543377	2	106128920	+	in gene
80146	UXS1	SNP_A-1798775	rs17032522	2	106128937	+	in gene
80146	UXS1	SNP_A-8492917	rs3860450	2	106129217	+	in gene
80146	UXS1	SNP_A-8673838	rs11685300	2	106132912	-	in gene
80146	UXS1	SNP_A-2242842	rs10192305	2	106133648	+	in gene
80146	UXS1	SNP_A-8461484	rs11682411	2	106137951	+	in gene
80146	UXS1	SNP_A-8445116	rs11889931	2	106141807	+	in gene
80146	UXS1	SNP_A-1958643	rs6543379	2	106154676	+	in gene
80146	UXS1	SNP_A-4282376	rs894392	2	106156092	-	in gene
80146	UXS1	SNP_A-8590393	rs4567955	2	106156548	+	in gene
80146	UXS1	SNP_A-8447925	rs1031070	2	106158719	-	in gene
80146	UXS1	SNP_A-1798050	rs4241223	2	106159954	-	in gene
80146	UXS1	SNP_A-1892803	rs4241224	2	106159994	+	in gene
80146	UXS1	SNP_A-8536425	rs11124088	2	106163264	-	in gene
80146	UXS1	SNP_A-1818106	rs6725081	2	106163329	+	in gene
80146	UXS1	SNP_A-4253402	rs2167536	2	106165962	+	in gene
80146	UXS1	SNP_A-4276886	rs11682222	2	106167688	+	in gene
80146	UXS1	SNP_A-8353065	rs13014335	2	106169237	-	in gene
80146	UXS1	SNP_A-4233660	rs6543384	2	106172627	-	in gene
80146	UXS1	SNP_A-1871830	rs6726248	2	106173279	+	in gene
80146	UXS1	SNP_A-8351661	rs1031072	2	106173977	+	in gene
80146	UXS1	SNP_A-8705080	rs2100329	2	106175879	-	in gene
80146	UXS1	SNP_A-8698272	rs1808898	2	106181330	+	4103
8673	VAMP8	SNP_A-2271325	rs13426038	2	85656909	-	-1319
8673	VAMP8	SNP_A-2138697	rs6757263	2	85657053	-	-1175
8673	VAMP8	SNP_A-8700671	rs1058588	2	85662382	-	in gene
8673	VAMP8	SNP_A-8634616	rs1010	2	85662493	+	in gene
8673	VAMP8	SNP_A-8382477	rs7593969	2	85663181	-	516
8673	VAMP8	SNP_A-8483373	rs1561198	2	85663500	+	835
55347	ABHD10	SNP_A-8659738	rs703271	3	113179583	-	-1006
55347	ABHD10	SNP_A-8570022	rs9817855	3	113179614	+	-975
55347	ABHD10	SNP_A-8527048	rs2172251	3	113180383	-	-206
55347	ABHD10	SNP_A-8365190	rs812149	3	113180431	+	-158
55347	ABHD10	SNP_A-8698808	rs510549	3	113182995	+	in gene
55347	ABHD10	SNP_A-4242654	rs3804765	3	113188682	+	in gene
55347	ABHD10	SNP_A-1799889	rs1282730	3	113188722	-	in gene
55347	ABHD10	SNP_A-2041063	rs16859018	3	113192394	-	in gene
55347	ABHD10	SNP_A-1802740	rs17429033	3	113193088	-	in gene
30	ACAA1	SNP_A-2114269	rs11129780	3	38136695	-	-2516
30	ACAA1	SNP_A-2202941	rs5875	3	38139378	+	in gene
30	ACAA1	SNP_A-8354248	rs2128111	3	38141329	+	in gene
30	ACAA1	SNP_A-1829152	rs13323977	3	38142639	-	in gene
30	ACAA1	SNP_A-8688638	rs2239621	3	38148737	-	in gene
30	ACAA1	SNP_A-2198601	rs4988453	3	38154258	+	639
30	ACAA1	SNP_A-2270931	rs4988457	3	38157140	-	3521
84129	ACAD11	SNP_A-8351293	rs6777072	3	133763620	-	in gene
84129	ACAD11	SNP_A-4281717	rs10935019	3	133766405	+	in gene
84129	ACAD11	SNP_A-8569826	rs6799862	3	133775175	-	in gene
84129	ACAD11	SNP_A-4258813	rs3762678	3	133781248	+	in gene
84129	ACAD11	SNP_A-1797834	rs7629689	3	133823800	-	in gene
84129	ACAD11	SNP_A-2264757	rs16839460	3	133830104	+	in gene
84129	ACAD11	SNP_A-8388943	rs1001122	3	133854468	+	in gene
84129	ACAD11	SNP_A-1939132	rs16839493	3	133864289	-	2624
84129	ACAD11	SNP_A-8331960	rs6792511	3	133864830	-	3165
28976	ACAD9	SNP_A-1808784	rs789233	3	130085840	+	in gene
28976	ACAD9	SNP_A-8292346	rs1683791	3	130096823	+	in gene
28976	ACAD9	SNP_A-4287552	rs1680778	3	130096875	+	in gene
28976	ACAD9	SNP_A-2102972	rs789213	3	130099049	-	in gene
[truncated: 11,025 more rows]
